# Supplementary material for: A multicountry perspective on gender differences in time use during COVID-19
Source: PubMed Central journal article supplement (PMC7999869; doi:10.1073/pnas.2018494118), 2021-03-08
Supplement: pnas.2018494118.sapp.pdf [file pnas.2018494118.sapp.pdf]

## Supporting Information for

### A Multi-Country Perspective on Gender Differences in Time-Use During COVID-19

#### This document contains:

|                                                                                                                   |    |
|-------------------------------------------------------------------------------------------------------------------|----|
| Detailed Measures and Demographics Across Sample 1-8 .....                                                        | 2  |
| Detailed Time-Use Measures and Descriptives Across Samples 1-8 .....                                              | 3  |
| Sample size for Nonmissing Values Across Samples .....                                                            | 7  |
| Measurement of Necessities Time-Use Composite Across Samples.....                                                 | 8  |
| Sensitivity Analyses for Effects of Gender and Gender X Parental Status Across Samples .....                      | 9  |
| Meta-Analyses: Gender Differences in Time-Use Across Samples (with Covariates) .....                              | 11 |
| Individual and Meta-Analytic Effect Sizes of Gender Differences in Time-Use Across Samples (with Covariates)..... | 14 |
| Meta-Analyses: Gender X Parental Status Differences in Time-Use Across Samples (with Covariates) .....            | 23 |
| Meta-Analyses: Gender and Gender X Parental Status Differences in Happiness Across Samples (with Covariates)..... | 28 |
| Meta-Analyses: Time-Use and Happiness Across Samples (with Covariates) .....                                      | 31 |
| Mega-Analyses Results.....                                                                                        | 33 |
| Sample 9 (924): All Results for Longitudinal Sample.....                                                          | 42 |
| Exploratory analyses with recalled pre-COVID-19 time-use .....                                                    | 51 |
| Additional Analyses Sample 4: Shared Time on Chores and Caretaking Responsibilities .....                         | 61 |

Data, code, meta-analytic workbooks, and analyses with the individual samples for this paper are available at: [https://osf.io/cqr7k/?view\\_only=08c946a8ba2444e1ace32cccb28666d3](https://osf.io/cqr7k/?view_only=08c946a8ba2444e1ace32cccb28666d3).

Our preregistered analytic plan for the correlational data is available at: <http://aspredicted.org/blind.php?x=e7qg3s>

Our preregistered analytic plan for the longitudinal data is available at: <http://aspredicted.org/blind.php?x=wf4d9u>

**Detailed Measures and Demographics Across Sample 1-8****Table S1**

Additional information for measures and demographic variables in Studies 1-8

| Study | <i>N</i> | Description                            | Primary Well-Being Measures      | Primary Time-Use Measures                                                            | Secondary Time-Use Measures | Secondary Well-Being Measures                | Omitted Demographics <sup>a</sup>                                                                       |
|-------|----------|----------------------------------------|----------------------------------|--------------------------------------------------------------------------------------|-----------------------------|----------------------------------------------|---------------------------------------------------------------------------------------------------------|
| 1     | 441      | US Representative <sup>c</sup>         | 2-item SWL<br>( $\alpha = .78$ ) | 1-item Work<br>1-item Active leisure<br>1-item Passive leisure                       | --                          | 1-item Purpose in Life                       | Education<br># of weekly work hours                                                                     |
| 2     | 840      | Canada Representative <sup>d</sup>     | 2-item SWL<br>( $\alpha = .78$ ) | 1-item Work<br>1-item Overall leisure                                                | --                          | 1-item Purpose in Life                       | Education<br>Income<br># of weekly work hours                                                           |
| 3     | 401      | US parents Representative <sup>e</sup> | 1-item SWL                       | 1-item Work<br>1-item Necessities<br>2-item Active leisure                           | Sleep<br>Other              | --                                           | Education<br>Parental status<br># of weekly work hours                                                  |
| 4     | 975      | Spain working adults                   | 3-item SWL<br>( $\alpha = .80$ ) | 2-item Work<br>3-item Active leisure<br>1-item Passive leisure<br>2-item Necessities | Sleep<br>Other              | 3-item Meaning in life<br>( $\alpha = .87$ ) | Marital status <sup>c</sup>                                                                             |
| 5     | 1,518    | US remote workers                      | 2-item SWL<br>( $\alpha = .89$ ) | 2-item Work<br>2-item Active leisure<br>1-item Passive leisure<br>1-item Necessities | Sleep                       | --                                           | Employment status<br>Marital status <sup>c</sup><br># of weekly work hours                              |
| 6     | 21,874   | Brazil remote workers                  | 2-item SWL<br>( $\alpha = .89$ ) | 2-item Work<br>2-item Active leisure<br>1-item Passive leisure<br>1-item Necessities | Sleep                       | --                                           | Employment status<br>Marital status <sup>c</sup><br># of weekly work hours                              |
| 7     | 935      | Other countries remote workers         | 2-item SWL<br>( $\alpha = .85$ ) | 2-item Work<br>2-item Active leisure<br>1-item Passive leisure<br>1-item Necessities | Sleep                       | --                                           | Employment status<br>Marital status <sup>c</sup><br># of weekly work hours                              |
| 8     | 3,233    | Danish post-secondary students         | 3-item SWL<br>( $\alpha = .85$ ) | 2-item work<br>1-item Active leisure<br>1-item Passive leisure                       | --                          | 3-item Meaning in life<br>( $\alpha = .90$ ) | Income<br>Education<br>Marital status<br>Parental status<br>Employment status<br># of weekly work hours |

*Note.* The symbol "--" indicates that the variable was not assessed in that study. <sup>a</sup> Across all studies (unless otherwise indicated as omitted), respondents reported their age and gender. <sup>b</sup> In these studies we recorded household size (i.e. whether respondents live alone or with others in the household). <sup>c</sup> Respondents were nationally representative in terms of age, gender, ethnicity, and occupation status (i.e., full-time employed) for the US. <sup>d</sup> Respondents were nationally representative in terms of age, gender, ethnicity, and occupation status (i.e., full-time employed) for Canada. <sup>e</sup> Respondents were nationally representative in terms of age, gender and ethnicity. Sample size is based on all available data in each sample.

**Detailed Time-Use Measures and Descriptives Across Samples 1-8****Table S2**

Descriptive statistics for the primary time-use measures in studies 1-8

|                              | Sample 1                         | Sample 2                             | Sample 3                  | Sample 4                          | Sample 5                       | Sample 6                           | Sample 7                                    | Sample 8                              |
|------------------------------|----------------------------------|--------------------------------------|---------------------------|-----------------------------------|--------------------------------|------------------------------------|---------------------------------------------|---------------------------------------|
| <b>Time-Use Composites</b>   | US representative <sup>a,d</sup> | Canada representative <sup>a,d</sup> | US parents representative | Spain working adults <sup>c</sup> | US remote workers <sup>d</sup> | Brazil remote workers <sup>d</sup> | Other countries remote workers <sup>d</sup> | Denmark college students <sup>d</sup> |
| Work                         | 27.37%<br>(30.16)                | 40.22%<br>(40.04)                    | 16.90%<br>(15.53)         | 34.84%<br>(15.07)                 | 38.29%<br>(12.43)              | 34.94%<br>(9.42)                   | 35.95%<br>(9.73)                            | 46.33%<br>(22.24)                     |
| Overall leisure <sup>b</sup> | 72.63%<br>(30.16)                | 59.96%<br>(40.01)                    | 25.00%<br>(15.57)         | 21.67%<br>(12.61)                 | 15.99<br>(6.99)                | 14.62%<br>(6.81)                   | 15.80%<br>(7.43)                            | 53.70%<br>(22.23)                     |
| Active leisure               | 22.72%<br>(19.71)                | --                                   | 13.57%<br>(11.87)         | 12.45%<br>(9.53)                  | 6.75<br>(4.22)                 | 5.00%<br>(4.21)                    | 5.86%<br>(4.54)                             | 22.24%<br>(16.29)                     |
| Passive leisure              | 50.14%<br>(27.82)                | --                                   | --                        | 9.22%<br>(7.62)                   | 9.38<br>(5.68)                 | 9.78%<br>(5.39)                    | 10.06%<br>(5.87)                            | 31.48%<br>(19.65)                     |
| Necessities                  | --                               | --                                   | 35.67%<br>(19.78)         | 21.07%<br>(14.32)                 | 16.47<br>(9.34)                | 20.87<br>(10.27)                   | 18.31%<br>(10.14)                           | --                                    |

*Note.* The symbol "--" indicates that the variable was not assessed in that study. Descriptive statistics for the time-use measures are reported as episode-weighted statistics (i.e. the percentage of time that respondents reported spending on each activity is weighted by the total amount of time they spent in all other activities measured within that sample).<sup>a</sup> In these studies we measured time-use on work, active, and passive leisure with 1-item. <sup>b</sup> Overall leisure is a composite of active and passive leisure across all studies. The composites differ per study and the exact items are presents in the tables below <sup>c</sup> Passive leisure in these studies was measured with 1-item only. <sup>d</sup> In these datasets, active and passive leisure were measured with 1-item each.

**Table S3a**

Summary of individual time-use activities (Sample 1)

| <b>Time-use Composites</b> | <b>Individual Time-Use Items (# of hours per week)</b>                                                                              | <b>Mean (SD)</b> |
|----------------------------|-------------------------------------------------------------------------------------------------------------------------------------|------------------|
| Work                       | # of hours per week spent on paid work                                                                                              | 16.56 (19.41)    |
| Active leisure             | # of hours per week spent on active leisure (e.g., going outdoors, praying/meditating, exercising, intimate relations, socializing) | 24.91 (22.36)    |
| Passive leisure            | # of hours per week spent on passive leisure (e.g., watching TV, relaxing, doing nothing, or resting)                               | 38.65 (55.54)    |

*Note.*  $N = 440$ .  $SD$  = Standard deviation. In this dataset, we did not record times spent on necessities.

**Table S3b**

Summary of individual time-use activities (Sample 2)

| <b>Time-use Composites</b> | <b>Individual Time-Use Items (# of hours per week)</b>                                                                              | <b>Mean (SD)</b> |
|----------------------------|-------------------------------------------------------------------------------------------------------------------------------------|------------------|
| Work                       | # of hours per week spent on paid work                                                                                              | 16.21 (19.68)    |
| Active leisure             | # of hours per week spent on active leisure (e.g., going outdoors, praying/meditating, exercising, intimate relations, socializing) | 15.08 (56.87)    |

*Note.*  $N = 840$ .  $SD$  = Standard deviation. In this dataset, we did not record time spent on passive leisure or necessities.

**Table S3c**

Summary of individual time-use activities (Sample 3)

| <b>Time-use Composites</b> | <b>Individual Time-Use Items (% out of 100)</b>                                               | <b>Mean (SD)</b> |
|----------------------------|-----------------------------------------------------------------------------------------------|------------------|
| Work                       | % Working on tasks for one's employer/company                                                 | 16.90 (15.53)    |
| Overall leisure            | % Taking care of yourself (exercising, meditating, watching TV, reading, relaxing, etc.)      | 11.43 (9.94)     |
| Active leisure             | % Spending time alone with your partner                                                       | 7.41 (7.57)      |
|                            | % Socializing with others (e.g., talking in-person or virtually with your friends and family) | 6.16 (7.46)      |
| Necessities                | % Doing household chores (e.g., preparing meals, doing laundry, cleaning, etc.)               | 12.13 (9.81)     |
|                            | % Taking care of your children (e.g., homeschooling, reading, playing with them, etc.)        | 23.54 (16.70)    |
| Other activities           | % Sleeping                                                                                    | 20.86 (13.71)    |
|                            | % Other                                                                                       | 1.57 (6.65)      |

*Note.*  $SD$  = Standard deviation. In this dataset, we did not record passive leisure separately from overall leisure.

**Table S3d**

Summary of individual time-use activities (Sample 4)

| <b>Time-use Composites</b> | <b>Individual Time-Use Items (% out of 100)</b>                                                              | <b>Mean (SD)</b> |
|----------------------------|--------------------------------------------------------------------------------------------------------------|------------------|
| Work                       | % Paid work (e.g., doing tasks for your employer/company)                                                    | 28.43 (14.76)    |
|                            | % Deep work hours (hours in which you work continuously on one core work task for extended periods of time)  | 6.41 (11.96)     |
| Active leisure             | % Leisure activities like going outdoors, praying/socializing, intimate relations, socializing, volunteering | 6.68 (6.24)      |
|                            | % Social activities with work colleagues (e.g., virtual drinks)                                              | 1.26 (2.72)      |
|                            | % Social activities with friends and family (e.g., virtual get together)                                     | 4.52 (5.00)      |
| Passive leisure            | % Leisure activities like watching TV, relaxing, doing nothing, resting, etc.                                | 9.22 (7.62)      |
| Necessities                | % Doing household chores (e.g., preparing meals, doing laundry, cleaning, etc.)                              | 10.93 (6.24)     |
|                            | % Taking care of others in the household (e.g., your kids, elderly, etc.)                                    | 10.14 (12.36)    |
| Other activities           | % Sleeping                                                                                                   | 21.65 (10.70)    |
|                            | % Other                                                                                                      | .78 (3.18)       |

Note. *SD* = Standard deviation.

**Table S3e**

Summary of individual time-use activities (Sample 5)

| <b>Time-use Composites</b> | <b>Individual Time-Use Items (# hours)</b>                                     | <b>Mean (SD)</b> |
|----------------------------|--------------------------------------------------------------------------------|------------------|
| Work                       | Working productively (uninterrupted work time)                                 | 5.80 (2.18)      |
|                            | Working unproductively (distracted work time/multi-tasking)                    | 2.68 (1.97)      |
| Active leisure             | Leisure activities like exercising, playing games, socializing, going outdoors | 1.60 (1.26)      |
| Passive leisure            | Leisure activities like watching TV, relaxing, doing nothing, resting          | 2.26 (1.59)      |
| Necessities                | Doing errands or housework                                                     | 1.63 (1.30)      |
|                            | Taking care of or spending time with family <sup>a</sup>                       | 2.53 (2.36)      |
| Other activities           | Sleeping                                                                       | 6.89 (1.96)      |

Note. *SD* = Standard deviation. <sup>a</sup>This item can be treated as both active leisure (spending time with family) and a necessity (taking care of family). We treat it as a necessity given that COVID-19 has likely placed additional demands on people's time, including the need to spend more time with family that is not necessarily viewed as leisure time.

**Table S3f**

Summary of individual time-use activities (Sample 6)

| <b>Time-use Composites</b> | <b>Individual Time-Use Items (# hours)</b>                                     | <b>Mean (SD)</b> |
|----------------------------|--------------------------------------------------------------------------------|------------------|
| Work                       | Working productively (uninterrupted work time)                                 | 5.39 (2.17)      |
|                            | Working unproductively (distracted work time/multi-tasking)                    | 3.24 (2.46)      |
| Active leisure             | Leisure activities like exercising, playing games, socializing, going outdoors | 1.28 (1.25)      |
| Passive leisure            | Leisure activities like watching TV, relaxing, doing nothing, resting          | 2.48 (1.62)      |
| Necessities                | Doing errands or housework                                                     | 2.40 (1.79)      |
|                            | Taking care of or spending time with family <sup>a</sup>                       | 3.14 (2.66)      |
| Other activities           | Sleeping                                                                       | 7.14 (1.26)      |

*Note.* *SD* = Standard deviation. <sup>a</sup>This item can be treated as both active leisure (spending time with family) and a necessity (taking care of family). We treat it as a necessity given that COVID-19 has likely placed additional demands on people's time, including the need to spend more time with family that is not necessarily viewed as leisure time.

**Table S3g**

Summary of individual time-use activities (Sample 7)

| <b>Time-use Composites</b> | <b>Individual Time-Use Items (# hours)</b>                                     | <b>Mean (SD)</b> |
|----------------------------|--------------------------------------------------------------------------------|------------------|
| Work                       | Working productively (uninterrupted work time)                                 | 5.54 (2.50)      |
|                            | Working unproductively (e.g., distracted work time/multi-tasking)              | 3.20 (2.24)      |
| Active leisure             | Leisure activities like exercising, playing games, socializing, going outdoors | 1.51 (1.48)      |
| Passive leisure            | Leisure activities like watching TV, relaxing, doing nothing, resting          | 2.58 (1.87)      |
| Necessities                | Doing errands or housework                                                     | 2.09 (1.95)      |
|                            | Taking care of or spending time with family <sup>a</sup>                       | 2.86 (2.58)      |
| Other activities           | Sleeping                                                                       | 7.20 (1.35)      |

*Note.* *SD* = Standard deviation. <sup>a</sup>This item can be treated as both active leisure (spending time with family) and a necessity (taking care of family). We treat it as a necessity given that COVID-19 has likely placed additional demands on people's time, including the need to spend more time with family that is not necessarily viewed as leisure time.

**Table S3h**

Summary of individual time-use activities (Sample 8)

| <b>Time-use Composites</b> | <b>Individual Time-Use Items (# hours)</b>   | <b>Mean (SD)</b> |
|----------------------------|----------------------------------------------|------------------|
| Work                       | Schoolwork                                   | 29.14 (18.88)    |
|                            | Professional work                            | 7.52 (11.72)     |
| Active leisure             | Leisure activities like going outdoors, etc. | 19.01 (17.36)    |
| Passive leisure            | Leisure activities like watching TV, etc.    | 26.86 (21.32)    |

*Note.* *SD* = Standard deviation. In this study we did not record necessities.

**Sample size for Nonmissing Values Across Samples****Table S4**

Sample size for nonmissing values

|                        | <b>Sample<br/>1</b> | <b>Sample<br/>2</b> | <b>Sample<br/>3</b> | <b>Sample<br/>4</b> | <b>Sample<br/>5</b> | <b>Sample<br/>6</b> | <b>Sample<br/>7</b> | <b>Sample<br/>8</b> | <b>Sample<br/>9</b> | <b>Total</b> |
|------------------------|---------------------|---------------------|---------------------|---------------------|---------------------|---------------------|---------------------|---------------------|---------------------|--------------|
| Happiness              | 440                 | 840                 | 400                 | 866                 | 1,513               | 21,844              | 933                 | 3,182               | 924                 | 30,942       |
| Necessities            | -                   | -                   | 401                 | 710                 | 1,499               | 21,792              | 926                 | -                   | 921                 | 26,249       |
| Overall leisure        | 438                 | 783                 | 401                 | 710                 | 1,501               | 21,773              | 928                 | 2,799               | 921                 | 30,254       |
| Work                   | 438                 | 782                 | 401                 | 710                 | 1,507               | 21,834              | 928                 | 2,799               | 921                 | 30,320       |
| Active Leisure         | 438                 | 783                 | 401                 | 710                 | 1,492               | 21,140              | 916                 | 2,798               | 921                 | 29,599       |
| Passive Leisure        | 436                 | -                   | -                   | 710                 | 1,486               | 21,717              | 924                 | 2,798               | 921                 | 28,992       |
| Chores                 | -                   | -                   | 401                 | 710                 | 1,494               | 21,652              | 923                 | -                   | 914                 | 26,094       |
| Caretaking/Family Time | -                   | -                   | 401                 | 710                 | 1,448               | 21,406              | 912                 | -                   | -                   | 24,877       |
| Gender                 | 441                 | 833                 | 401                 | 880                 | 1,459               | 21,560              | 910                 | 3,229               | 899                 | 30,612       |
| Parental Status        | 441                 | 840                 | 22,798              | 525                 | 1,518               | 21,871              | 933                 | -                   | -                   | 48,926       |
| Employment Status      | 441                 | 840                 | 401                 | 884                 | 1,518               | 21,874              | 935                 | 3,233               | 3,233               | 33,359       |
| Age                    | 441                 | 840                 | 399                 | 883                 | 1,446               | 21,745              | 909                 | 3,233               | 924                 | 30,820       |

*Note.* Happiness was measured as a single-item question: "Taking all things together, how happy would you say you are? 0 = not at all to 10 = extremely" in Samples 4 to 9; "In general, to what extent do you feel happy these days? 0 = very unhappy to 10 = very happy" in Samples 1 to 3; and "When compared to before the COVID-19 pandemic, how happy are you? 1 = much less happy to 5 = much more happy". Tables S3a to S3e describes the sample specific items that were used to calculate the time-use composites.

**Measurement of Necessities Time-Use Composite Across Samples****Table S5**

Measurement of Necessities Across Samples

| <b>Sample</b>                                       | <b>Measurement of Necessities</b>                                                                                                                                        | <b>Measurement of Chores</b>                                                  | <b>Measurement of Taking Care of Others</b>                                             |
|-----------------------------------------------------|--------------------------------------------------------------------------------------------------------------------------------------------------------------------------|-------------------------------------------------------------------------------|-----------------------------------------------------------------------------------------|
| <b>Sample 1<br/>Representative<br/>US</b>           | NA                                                                                                                                                                       | NA                                                                            | NA                                                                                      |
| <b>Sample 2<br/>Representative<br/>Canada</b>       | NA                                                                                                                                                                       | NA                                                                            | NA                                                                                      |
| <b>Sample 3<br/>Parents - Representative<br/>US</b> | Taking care of your [Field-who] (e.g., homeschooling, reading, playing with them, etc.)<br>Doing household chores (e.g., preparing meals, doing laundry, cleaning, etc.) | Doing household chores (e.g., preparing meals, doing laundry, cleaning, etc.) | Taking care of your [Field-who] (e.g., homeschooling, reading, playing with them, etc.) |
| <b>Sample 4<br/>Workers<br/>Spain</b>               | Doing household chores (e.g., preparing meals, doing laundry, cleaning, etc.):<br>Taking care of others in the household (e.g. your kids, elderly, etc.)                 | Doing household chores (e.g., preparing meals, doing laundry, cleaning, etc.) | Taking care of others in the household (e.g. your kids, elderly, etc.)                  |
| <b>Sample 5<br/>Remote Workers<br/>US</b>           | Doing errands or housework<br>Taking care of or spending time with family                                                                                                | Doing errands or housework                                                    | Taking care of or spending time with family                                             |
| <b>Sample 6<br/>Remote Workers<br/>Brazil</b>       | Doing errands or housework<br>Taking care of or spending time with family                                                                                                | Doing errands or housework                                                    | Taking care of or spending time with family                                             |
| <b>Sample 7<br/>Remote Workers<br/>Global</b>       | Doing errands or housework<br>Taking care of or spending time with family                                                                                                | Doing errands or housework                                                    | Taking care of or spending time with family                                             |
| <b>Sample 8<br/>Students<br/>Denmark</b>            | NA                                                                                                                                                                       | NA                                                                            | NA                                                                                      |
| <b>Sample 9<br/>Students<br/>US</b>                 | Time spent shopping, personal hygiene, preparing food, doing housework.                                                                                                  | Preparing food, doing housework                                               | NA                                                                                      |



**Sensitivity Analyses for Effects of Gender and Gender X Parental Status Across Samples****Table S6a**  
Sensitivity Analyses for Gender Effects Across Samples

|          | <b>Sample size</b>                     | <b>95%<br/>Power</b> | <b>90%<br/>Power</b> | <b>85%<br/>Power</b> | <b>80%<br/>Power</b> |
|----------|----------------------------------------|----------------------|----------------------|----------------------|----------------------|
| Sample 1 | 441 (men = 196 vs. women = 243)        | d = .34              | d = .31              | d = .28              | d = .26              |
| Sample 2 | 840 (men = 311 vs. women = 522)        | d = .25              | d = .23              | d = .21              | d = .20              |
| Sample 3 | 401 (men = 185 vs. women = 215)        | d = .36              | d = .32              | d = .30              | d = .28              |
| Sample 4 | 975 (men = 274 vs. women = 606)        | d = .26              | d = .23              | d = .21              | d = .20              |
| Sample 5 | 1,518 (men = 560 vs. women = 895)      | d = .19              | d = .17              | d = .16              | d = .15              |
| Sample 6 | 21,874 (men = 10387 vs. women = 11173) | d = .04              | d = .04              | d = .04              | d = .03              |
| Sample 7 | 935 (men = 398 vs. women = 512)        | d = .24              | d = .21              | d = .20              | d = .18              |
| Sample 8 | 3,233 (men = 769 vs. women = 2460)     | d = .16              | d = .13              | d = .12              | d = .11              |
| Sample 9 | 924 (men = 241 vs. women = 658)        | d = .27              | d = .24              | d = .23              | d = .21              |

*Note.* These sensitivity analyses illustrate the effect size (Cohen's  $d$ ) we would be able to detect given each sample size at  $\alpha = .05$ .

**Table S6b**  
Sensitivity Analyses for Gender X Parental Status Interaction Effects Across Samples

|          | Sample size                                     | 95% Power | 90% Power | 85% Power | 80% Power |
|----------|-------------------------------------------------|-----------|-----------|-----------|-----------|
| Sample 1 | $N_{total} = 441$                               | $d = .34$ | $d = .30$ | $d = .28$ | $d = .26$ |
|          | $N_{Non-Dads} = 95$ vs. $N_{Non-Moms} = 107$    | $d = .51$ | $d = .46$ | $d = .42$ | $d = .40$ |
|          | $N_{Dads} = 103$ vs. $N_{Moms} = 136$           | $d = .47$ | $d = .43$ | $d = .39$ | $d = .37$ |
| Sample 2 | $N_{total} = 840$                               | $d = .24$ | $d = .27$ | $d = .25$ | $d = .22$ |
|          | $N_{Non-Dads} = 167$ vs. $N_{Non-Moms} = 311$   | $d = .35$ | $d = .31$ | $d = .29$ | $d = .27$ |
|          | $N_{Dads} = 144$ vs. $N_{Moms} = 211$           | $d = .39$ | $d = .35$ | $d = .32$ | $d = .30$ |
| Sample 4 | $N_{total} = 975$                               | $d = .27$ | $d = .25$ | $d = .23$ | $d = .22$ |
|          | $N_{Non-Dads} = 22$ vs. $N_{Non-Moms} = 36$     | $d = .99$ | $d = .89$ | $d = .83$ | $d = .77$ |
|          | $N_{Dads} = 147$ vs. $N_{Moms} = 319$           | $d = .36$ | $d = .32$ | $d = .30$ | $d = .28$ |
| Sample 5 | $N_{total} = 1,518$                             | $d = .22$ | $d = .20$ | $d = .18$ | $d = .17$ |
|          | $N_{Non-Dads} = 340$ vs. $N_{Non-Moms} = 613$   | $d = .24$ | $d = .22$ | $d = .20$ | $d = .19$ |
|          | $N_{Dads} = 220$ vs. $N_{Moms} = 286$           | $d = .32$ | $d = .29$ | $d = .27$ | $d = .25$ |
| Sample 6 | $N_{total} = 21,874$                            | $d = .05$ | $d = .05$ | $d = .04$ | $d = .04$ |
|          | $N_{Non-Dads} = 5947$ vs. $N_{Non-Moms} = 6788$ | $d = .06$ | $d = .06$ | $d = .05$ | $d = .05$ |
|          | $N_{Dads} = 4438$ vs. $N_{Moms} = 4384$         | $d = .08$ | $d = .07$ | $d = .06$ | $d = .06$ |
| Sample 7 | $N_{total} = 935$                               | $d = .28$ | $d = .25$ | $d = .24$ | $d = .22$ |
|          | $N_{Non-Dads} = 216$ vs. $N_{Non-Moms} = 287$   | $d = .33$ | $d = .29$ | $d = .27$ | $d = .25$ |
|          | $N_{Dads} = 181$ vs. $N_{Moms} = 224$           | $d = .36$ | $d = .32$ | $d = .30$ | $d = .28$ |

*Note.* These sensitivity analyses illustrate the effect size (Cohen's  $d$ ) we would be able to detect given each sample size at  $\alpha = .05$ . In sample 3 we collected data among working parents. In Samples 8-9, we collected data among students and did not measure parental status.

**Meta-Analyses: Gender Differences in Time-Use Across Samples (with Covariates)**

**Table S7a**

Standardized beta and r-partial for gender (1=female) predicting time-use (with covariates)

| Sample   | Necessities          |      |     | Chores               |      |     | Caretaking/<br>Family time |      |     | Overall leisure      |      |      | Active leisure       |      |      | Passive leisure      |      |      | Work                 |      |      |
|----------|----------------------|------|-----|----------------------|------|-----|----------------------------|------|-----|----------------------|------|------|----------------------|------|------|----------------------|------|------|----------------------|------|------|
|          | $\beta$<br>(p-value) | (se) | r   | $\beta$<br>(p-value) | (se) | r   | $\beta$<br>(p-value)       | (se) | r   | $\beta$<br>(p-value) | (se) | r    | $\beta$<br>(p-value) | (se) | r    | $\beta$<br>(p-value) | (se) | r    | $\beta$<br>(p-value) | (se) | r    |
| <b>1</b> |                      |      |     |                      |      |     |                            |      |     | .05<br>(.417)        | .05  | .04  | .03<br>(.719)        | .09  | .02  | .04<br>(.584)        | .08  | .03  | -.05<br>(.417)       | .06  | -.04 |
| <b>2</b> |                      |      |     |                      |      |     |                            |      |     |                      |      |      | .14<br>(.006)        | .05  | .10  |                      |      |      | -.13<br>(.010)       | .05  | -.09 |
| <b>3</b> | .42<br>( $<.001$ )   | .09  | .23 | .12<br>(.271)        | .11  | .06 | .43<br>( $<.001$ )         | .09  | .22 | -.26<br>(.016)       | .11  | -.26 | -.32<br>(.003)       | .11  | -.15 |                      |      |      | -.08<br>(.326)       | .09  | -.05 |
| <b>4</b> | .27<br>(.009)        | .10  | .13 | .08<br>(.460)        | .11  | .04 | .27<br>(.008)              | .10  | .13 | -.23<br>(.014)       | .09  | -.12 | -.10<br>(.320)       | .10  | -.05 | -.27<br>(.003)       | .09  | -.15 | .12<br>(.265)        | .11  | .06  |
| <b>5</b> | .21<br>( $<.001$ )   | .05  | .11 | .10<br>(.075)        | .06  | .05 | .20<br>( $<.001$ )         | .06  | .10 | -.17<br>(.002)       | .06  | -.08 | -.19<br>(.001)       | .06  | -.09 | -.07<br>(.209)       | .06  | -.04 | -.02<br>(.793)       | .06  | -.01 |
| <b>6</b> | .32<br>( $<.001$ )   | .01  | .17 | .41<br>( $<.001$ )   | .01  | .21 | .14<br>( $<.001$ )         | .02  | .07 | -.33<br>( $<.001$ )  | .01  | -.17 | -.30<br>( $<.001$ )  | .01  | -.15 | -.18<br>( $<.001$ )  | .01  | -.09 | -.06<br>( $<.001$ )  | .01  | -.03 |
| <b>7</b> | .23<br>(.001)        | .07  | .12 | .20<br>(.005)        | .07  | .10 | .19<br>(.008)              | .07  | .10 | -.03<br>(.689)       | .07  | -.02 | -.03<br>(.672)       | .08  | -.02 | -.01<br>(.859)       | .07  | -.01 | -.18<br>(.018)       | .08  | -.09 |
| <b>8</b> |                      |      |     |                      |      |     |                            |      |     | -.12<br>(.009)       | .05  | -.05 | .26<br>( $<.001$ )   | .05  | .11  | -.35<br>( $<.001$ )  | .05  | -.15 | .12<br>(.011)        | .05  | .05  |
| <b>9</b> | .25<br>(.001)        | .08  | .11 | .15<br>(.052)        | .08  | .07 |                            |      |     | -.10<br>(.194)       | .08  | -.05 | -.25<br>(.001)       | .07  | -.11 | .09<br>(.234)        | .08  | .04  | -.02<br>(.772)       | .08  | -.01 |

*Note.*  $\beta$  = standardized regression beta; se = standard error;  $r$  = r-partial; Necessities is a composite of chores, caretaking, and/or family time. Overall leisure is a composite of active and passive leisure. Work is a composite of paid work and school work (Samples 8-9). Covariates in Sample 1 are: age, household income, employment status, marital status, and number of children. Covariates in Sample 2 are: age, employment status, marital status, number of children, and days since the survey was launched. Covariates in Sample 3 are: age, household income, employment status, marital status, and number of children. Covariates in Sample 4 are: age, household income, employment status, weekly work hours (apart from models with time-use work), household size, education level, number of children, and days since the survey was launched. Covariates in Sample 5-7 are: age, household income, household size, education level, number of children, and days since the survey was launched. Covariates in Sample 8 are: age and days since survey was launched. Covariates in Sample 9 are: age, race, socio-economic status (composite of parental education and income), household size, and days since the survey was launched.

**Table S7b**

Meta-Analysis of Gender (1=Female) on Time-Use During COVID-19 Across Samples

| <b>Time-Use Composites</b>                  | <b>Included Samples</b> | <b><math>\beta</math></b> | <b>SE</b> | <b>CI Lower limit</b> | <b>CI Upper limit</b> | <b>PI Lower limit</b> | <b>PI Upper limit</b> | <b>z-value</b> | <b>Two-tailed p-value</b> |
|---------------------------------------------|-------------------------|---------------------------|-----------|-----------------------|-----------------------|-----------------------|-----------------------|----------------|---------------------------|
| Necessities                                 | 3-7, 9                  | .29                       | .03       | .21                   | .36                   | .15                   | .42                   | 10.24          | <.0001                    |
| <i>Chores</i>                               | 3-7, 9                  | .18                       | .05       | .05                   | .32                   | -.30                  | .67                   | 3.55           | <.0001                    |
| <i>Caretaking + Caretaking /Family time</i> | 3-7                     | .22                       | .05       | .09                   | .35                   | -.03                  | .46                   | 4.70           | <.0001                    |
| <i>Caretaking</i>                           | 3-4                     | .35                       | .08       | -.66                  | 1.37                  | -.90                  | 1.61                  | 4.43           | <.0001                    |
| <i>Caretaking /Family time</i>              | 5-7                     | .15                       | .01       | .09                   | .21                   | .09                   | .21                   | 10.48          | <.0001                    |
| Overall leisure                             | 1, 3-9                  | -.15                      | .04       | -.25                  | -.04                  | -.55                  | .25                   | -3.28          | .001                      |
| Active leisure                              | All samples             | -.08                      | .07       | -.24                  | .08                   | -.69                  | .53                   | -1.20          | .229                      |
| Passive leisure                             | 1, 3-9                  | -.11                      | .06       | -.26                  | .04                   | -.45                  | .22                   | -1.86          | .063                      |
| Work                                        | All samples             | -.04                      | .03       | -.11                  | .04                   | -.20                  | .13                   | -1.14          | .253                      |

*Note.* CI = confidence interval. PI = prediction interval. Necessities is a composite of chores, caretaking, and/or family time. Overall leisure is a composite of active and passive leisure. Work is a composite of paid work and school work (Samples 8-9). Covariates in Sample 1 are: age, household income, employment status, marital status, and number of children. Covariates in Sample 2 are: age, employment status, marital status, number of children, and days since the survey was launched. Covariates in Sample 3 are: age, household income, employment status, weekly work hours, marital status, and number of children. Covariates in Sample 4 are: age, household income, employment status, household size, weekly work hours (apart from models with time-use work), education level, number of children, and days since the survey was launched. Covariates in Sample 5-7 are: age, household income, household size, education level, number of children, and days since the survey was launched. Covariates in Sample 8 are: age and days since survey was launched. Covariates in Sample 9 are: age, race, socio-economic status (composite of parental education and income), household size, and days since the survey was launched.

**Fig. S1 | The meta-analytic effect of gender (1=women) on time-use samples based on models with covariates.**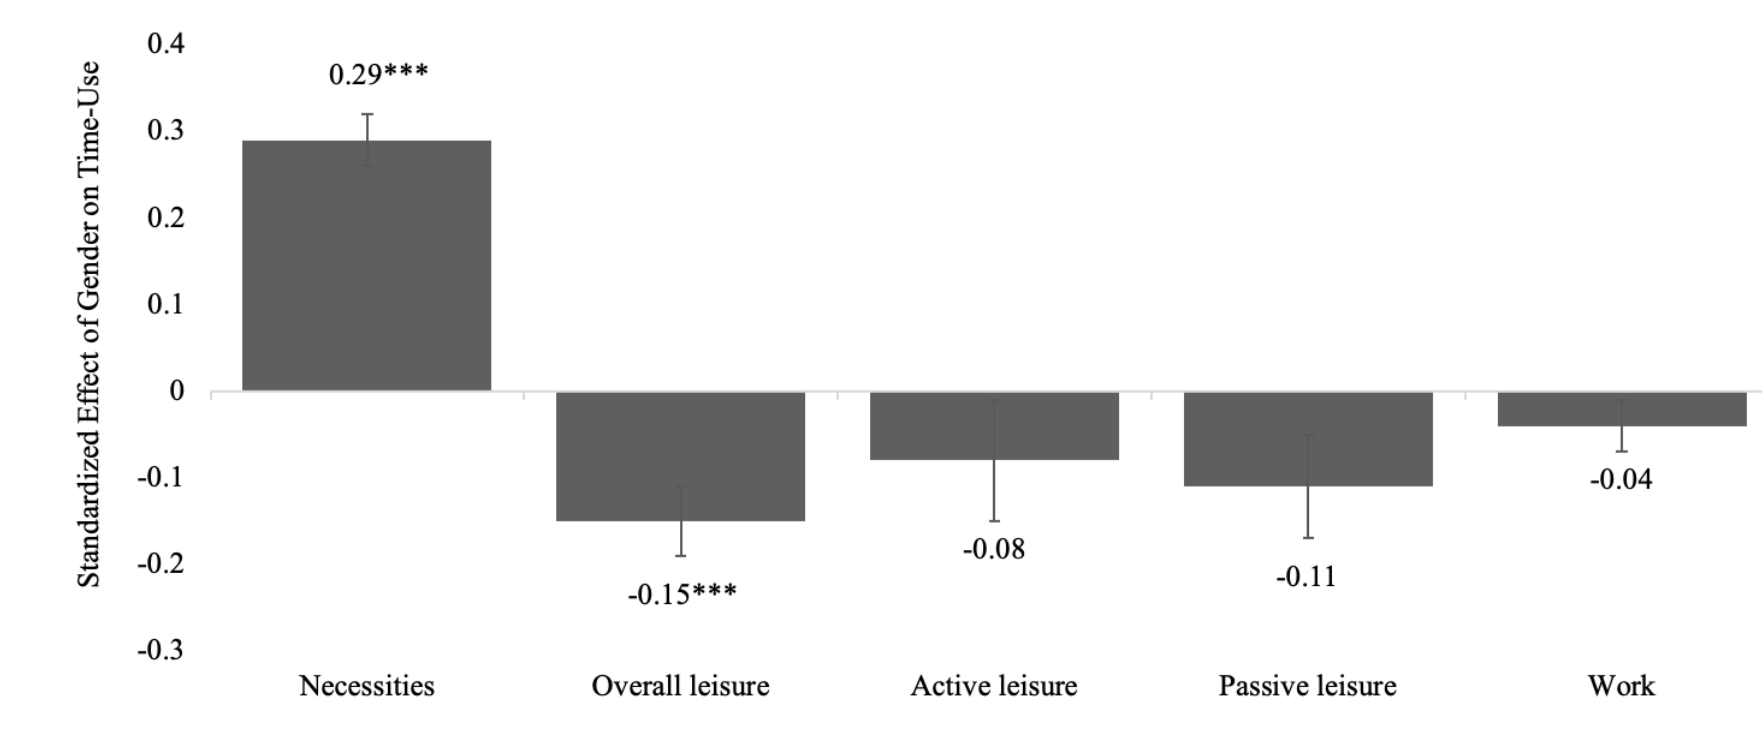

*Note:* For the necessities (composite) effect, we included Samples 3-7 and Sample 9. For the overall leisure effect, we included Sample 1 and Samples 3-9. For the active leisure effect, we included all samples. For the passive leisure effect, we included Sample 1 and Samples 4-9. While the meta-analytic effect for necessities and overall leisure was significant, it was only for necessities that the prediction interval did not include zero (see Table S17a for details and covariates included).

**Individual and Meta-Analytic Effect Sizes of Gender Differences in Time-Use Across Samples (with Covariates)****Fig. S2a | Meta-Analysis: Gender Differences in Time Spent on Necessities (Composite) During COVID-19.**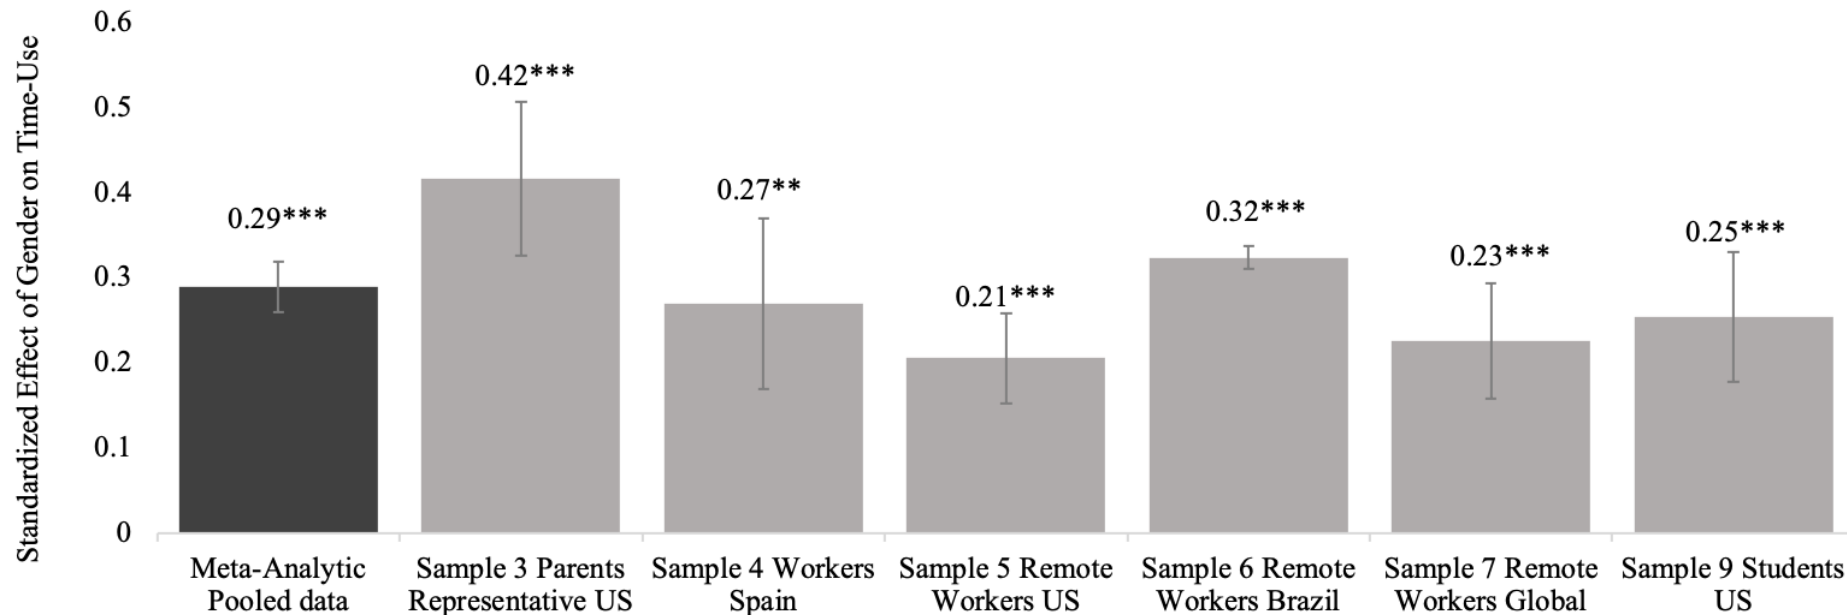

*Note.* Necessities is a composite of chores, caretaking, and/or family time. Covariates in Sample 1 are: age, household income, employment status, marital status, and number of children. Covariates in Sample 2 are: age, employment status, marital status, number of children, and days since the survey was launched. Covariates in Sample 3 are: age, household income, employment status, marital status, and number of children. Covariates in Sample 4 are: age, household income, employment status, household size, weekly work hours (apart from models with time-use work), education level, number of children, and days since the survey was launched. Covariates in Sample 5-7 are: age, household income, household size, education level, number of children, and days since the survey was launched. Covariates in Sample 8 are: age and days since survey was launched. Covariates in Sample 9 are: age, race, socio-economic status (composite of parental education and income), household size, and days since the survey was launched.

**Fig. S2b | Meta-Analysis: Gender Differences in Time Spent on Chores During COVID-19.**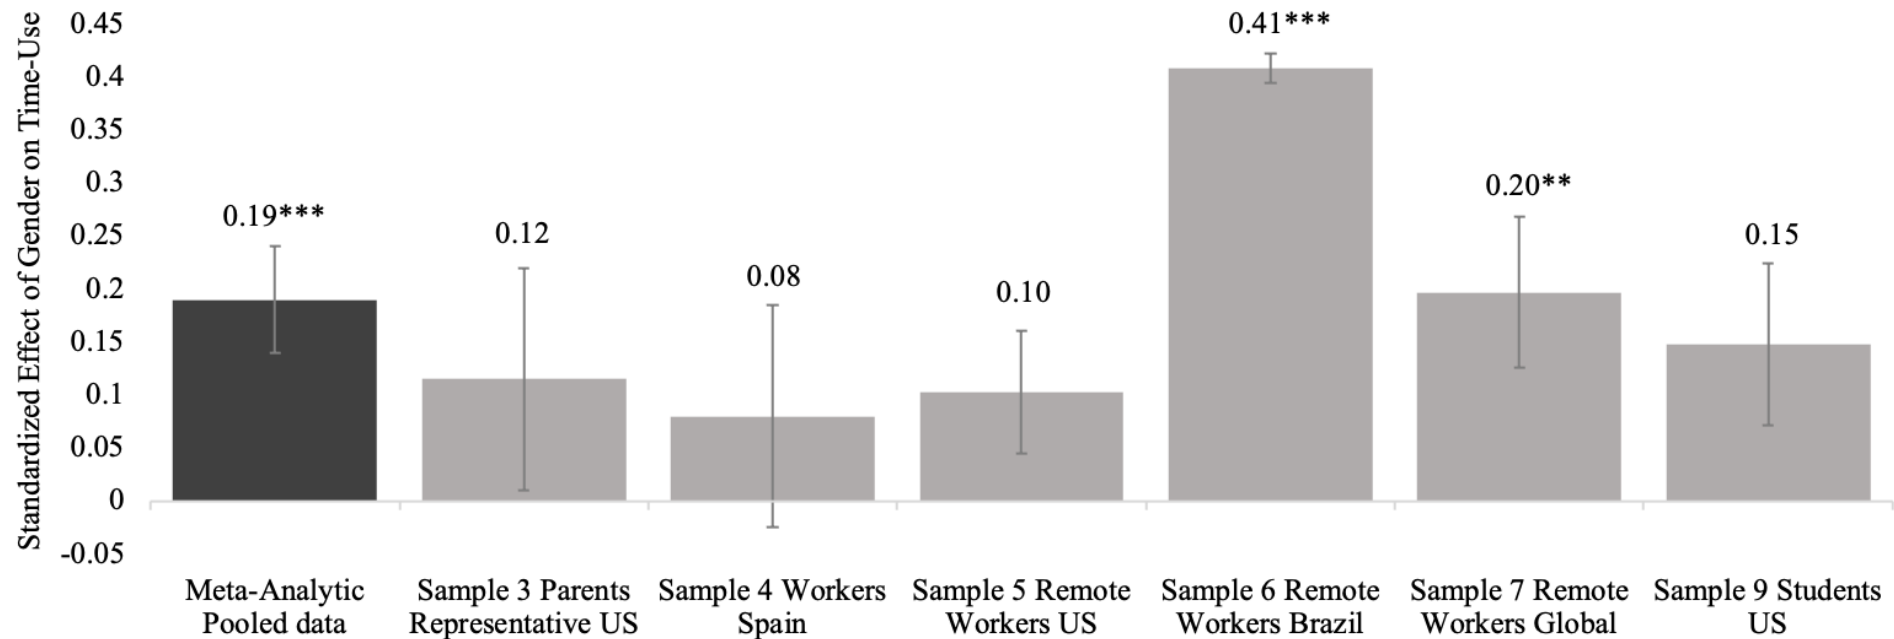

*Note.* Covariates in Sample 1 are: age, household income, employment status, marital status, and number of children. Covariates in Sample 2 are: age, employment status, marital status, number of children, and days since the survey was launched. Covariates in Sample 3 are: age, household income, employment status, marital status, and number of children. Covariates in Sample 4 are: age, household income, employment status, household size, education level, weekly work hours (apart from models with time-use work), number of children, and days since the survey was launched. Covariates in Sample 5-7 are: age, household income, household size, education level, number of children, and days since the survey was launched. Covariates in Sample 8 are: age and days since survey was launched. Covariates in Sample 9 are: age, race, socio-economic status (composite of parental education and income), household size, and days since the survey was launched.

**Fig. S2c | Meta-Analysis: Gender Differences in Time Spent on Caretaking/Family Time (Samples 3-7) During COVID-19.**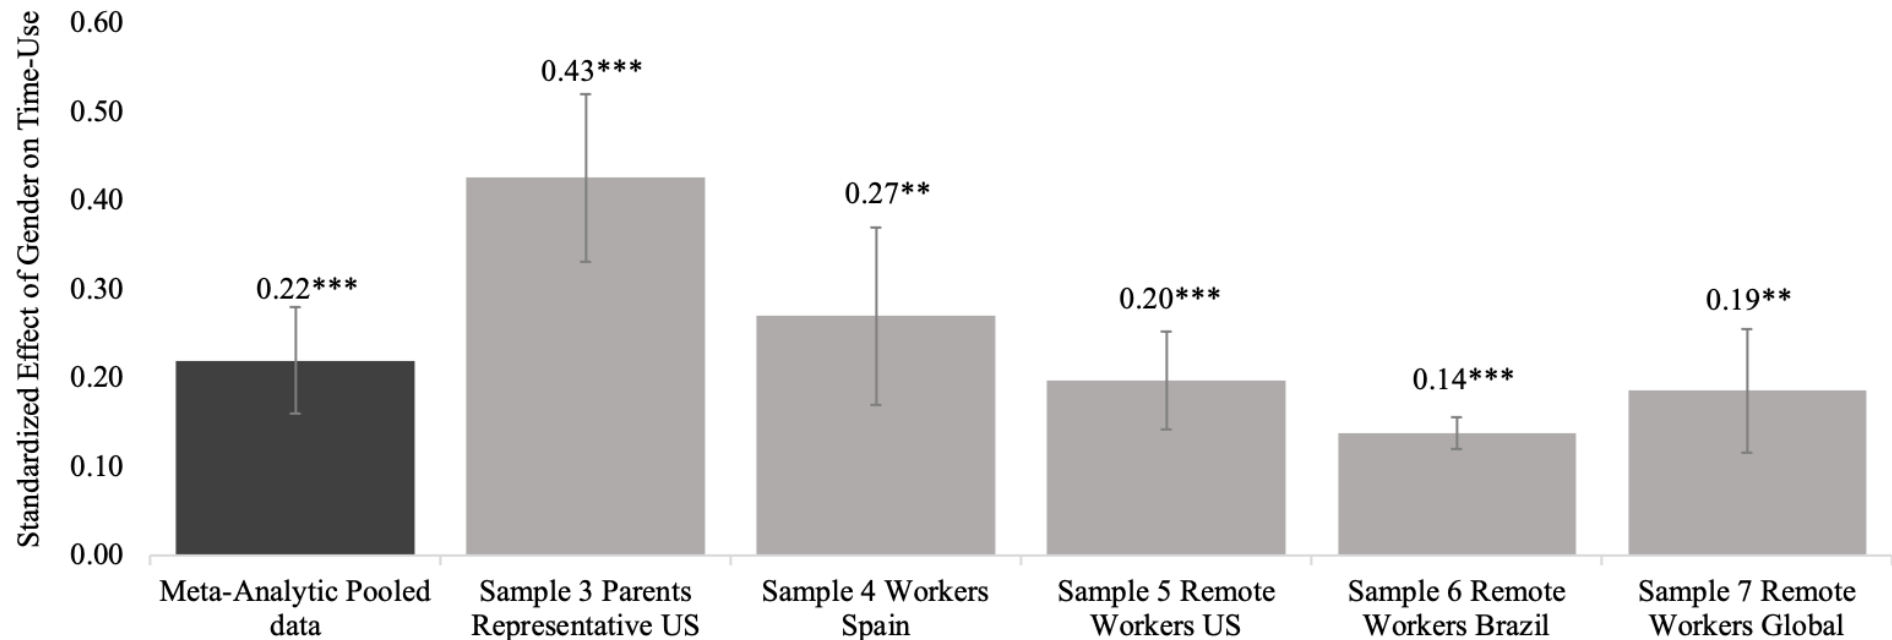

*Note.* Covariates in Sample 1 are: age, household income, employment status, marital status, and number of children. Covariates in Sample 2 are: age, employment status, marital status, number of children, and days since the survey was launched. Covariates in Sample 3 are: age, household income, employment status, marital status, and number of children. Covariates in Sample 4 are: age, household income, employment status, household size, weekly work hours (apart from models with time-use work), education level, number of children, and days since the survey was launched. Covariates in Sample 5-7 are: age, household income, household size, education level, number of children, and days since the survey was launched. Covariates in Sample 8 are: age and days since survey was launched. Covariates in Sample 9 are: age, race, socio-economic status (composite of parental education and income), household size, and days since the survey was launched.



**Fig. S2d | Meta-Analysis: Gender Differences in Time Spent on Caretaking (Samples 3-4) During COVID-19.**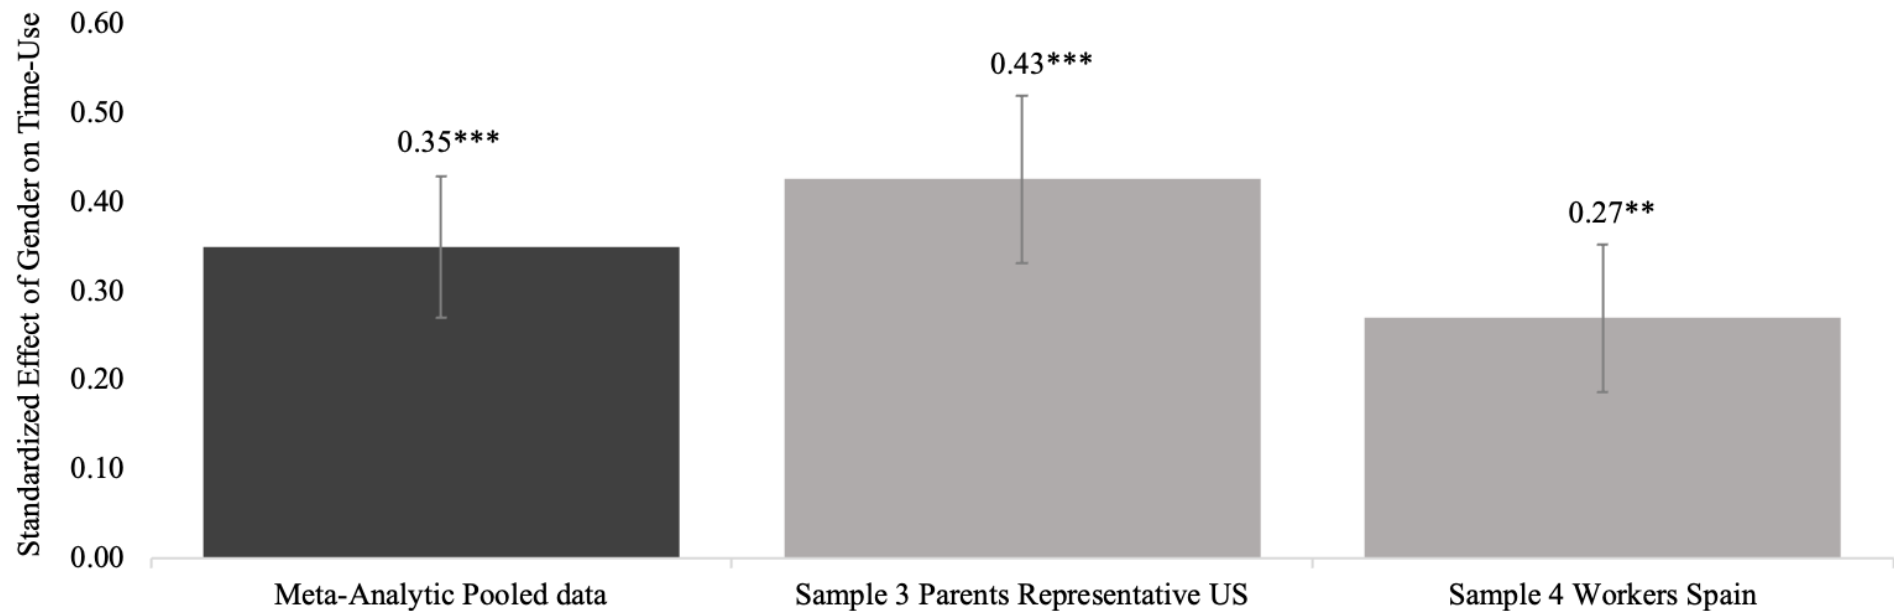

*Note.* Covariates in Sample 1 are: age, household income, employment status, marital status, and number of children. Covariates in Sample 2 are: age, employment status, marital status, number of children, and days since the survey was launched. Covariates in Sample 3 are: age, household income, employment status, marital status, and number of children. Covariates in Sample 4 are: age, household income, employment status, household size, education level, weekly work hours (apart from models with time-use work), number of children, and days since the survey was launched. Covariates in Sample 5-7 are: age, household income, household size, education level, number of children, and days since the survey was launched. Covariates in Sample 8 are: age and days since survey was launched. Covariates in Sample 9 are: age, race, socio-economic status (composite of parental education and income), household size, and days since the survey was launched.

**Fig. S2e | Meta-Analysis: Gender Differences in Time Spent on Caretaking/Family Time (Samples 5-7) During COVID-19.**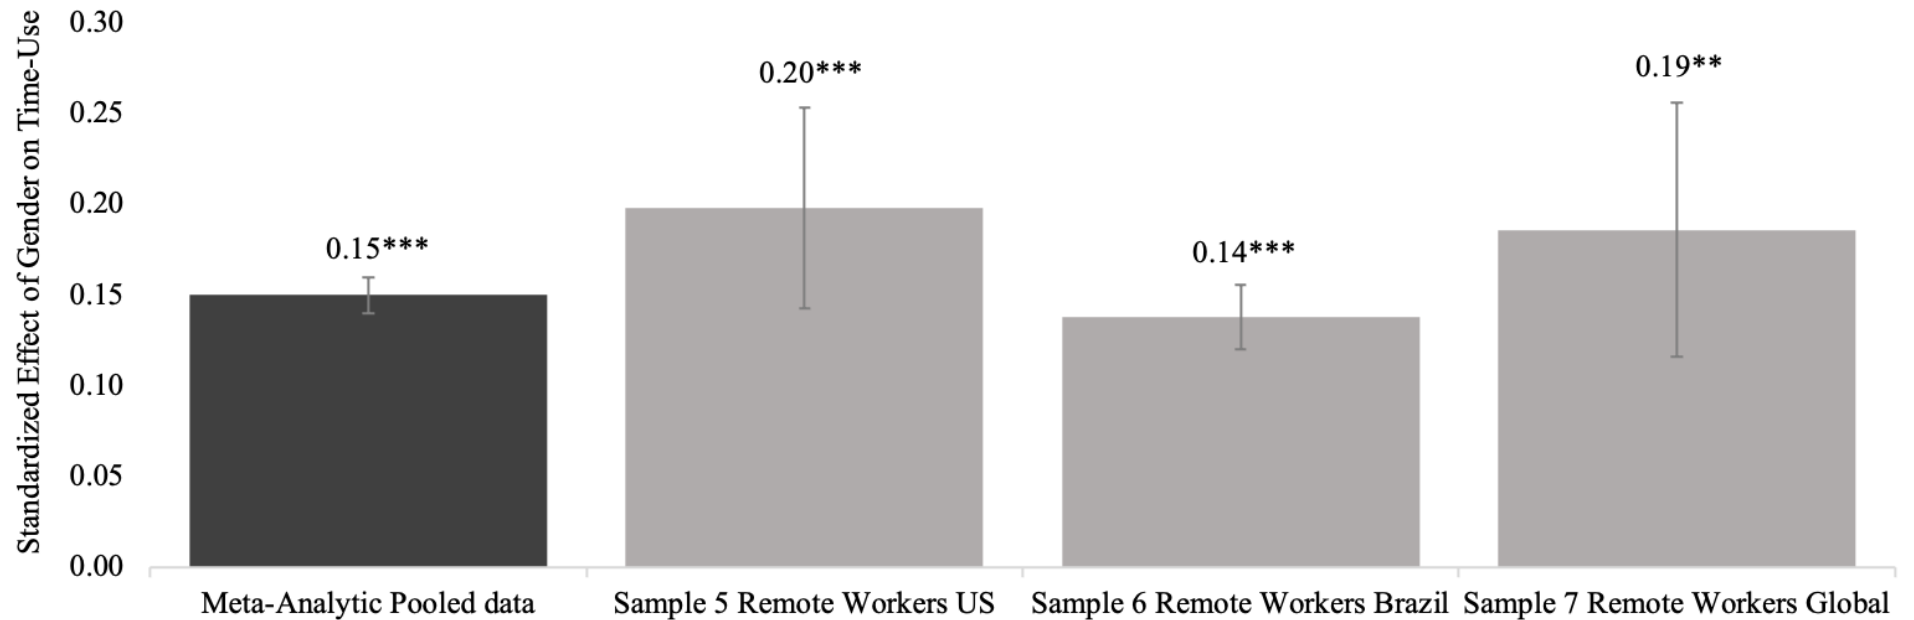

*Note.* Covariates in Sample 1 are: age, household income, employment status, marital status, and number of children. Covariates in Sample 2 are: age, employment status, marital status, number of children, and days since the survey was launched. Covariates in Sample 3 are: age, household income, employment status, marital status, and number of children. Covariates in Sample 4 are: age, household income, employment status, household size, education level, weekly work hours (apart from models with time-use work), number of children, and days since the survey was launched. Covariates in Sample 5-7 are: age, household income, household size, education level, number of children, and days since the survey was launched. Covariates in Sample 8 are: age and days since survey was launched. Covariates in Sample 9 are: age, race, socio-economic status (composite of parental education and income), household size, and days since the survey was launched.

**Fig. S2f | Meta-Analysis: Gender Differences in Time Spent on Overall Leisure COVID-19.**

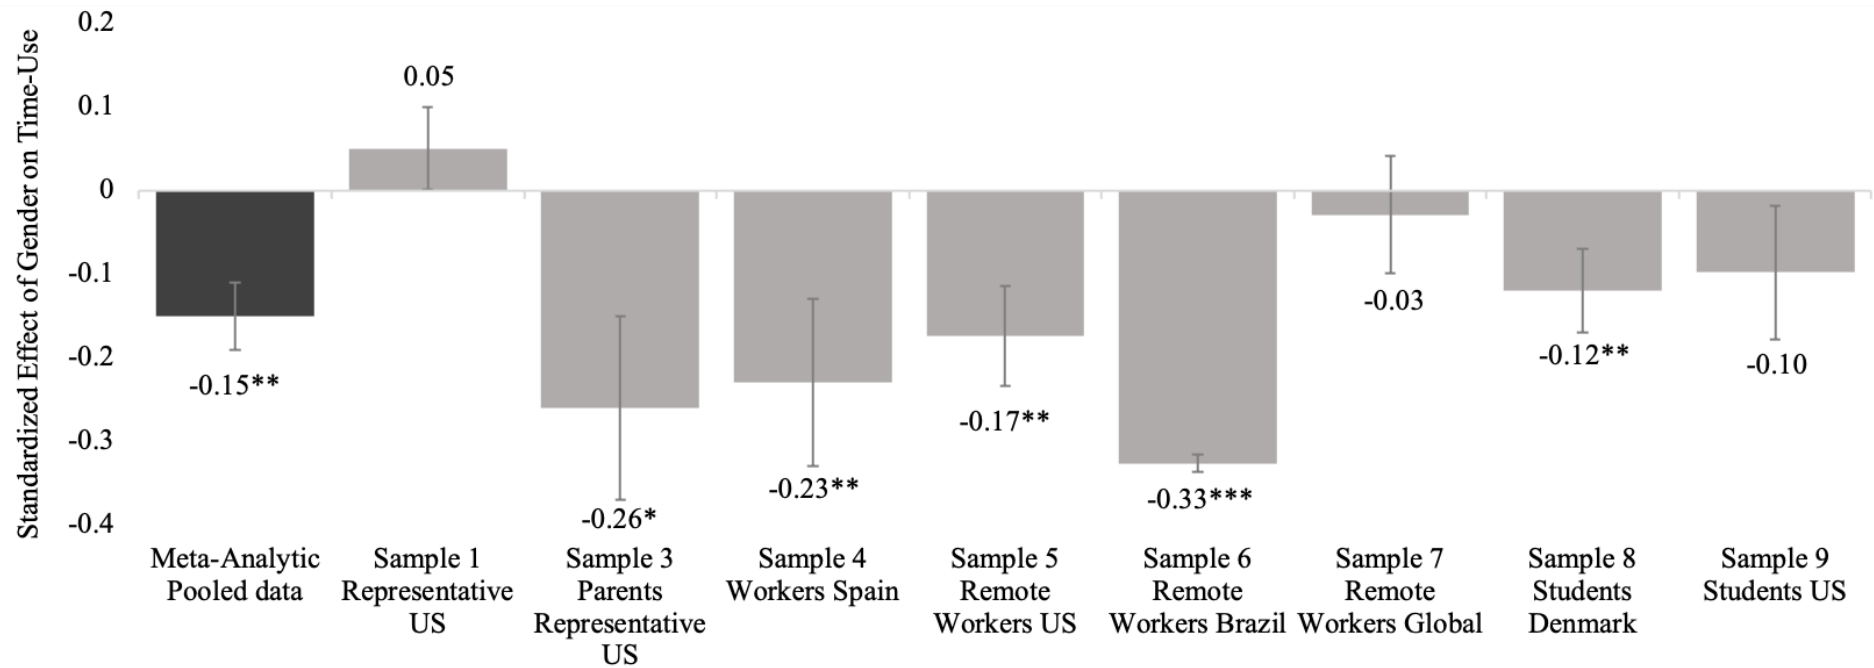

*Note.* Overall leisure is a composite of active and passive leisure. Covariates in Sample 1 are: age, household income, employment status, marital status, and number of children. Covariates in Sample 2 are: age, employment status, marital status, number of children, and days since the survey was launched. Covariates in Sample 3 are: age, household income, employment status, marital status, and number of children. Covariates in Sample 4 are: age, household income, employment status, household size, weekly work hours (apart from models with time-use work), education level, number of children, and days since the survey was launched. Covariates in Sample 5-7 are: age, household income, household size, education level, number of children, and days since the survey was launched. Covariates in Sample 8 are: age and days since survey was launched. Covariates in Sample 9 are: age, race, socio-economic status (composite of parental education and income), household size, and days since the survey was launched.

**Fig. S2g | Meta-Analysis: Gender Differences in Time Spent on Active Leisure During COVID-19.**

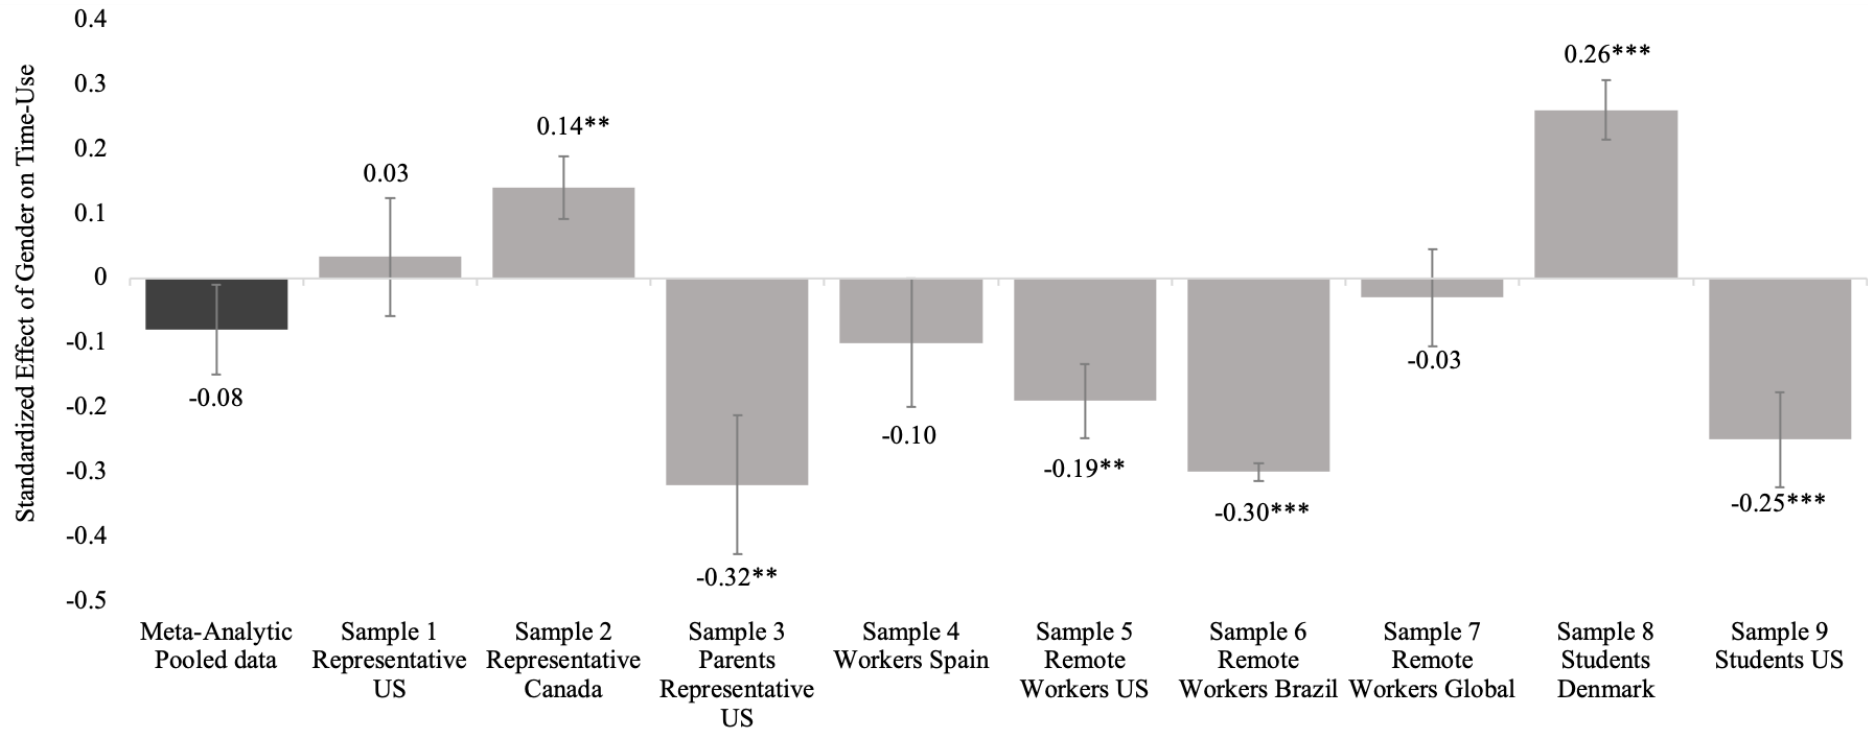

*Note.* Covariates in Sample 1 are: age, household income, employment status, marital status, and number of children. Covariates in Sample 2 are: age, employment status, marital status, number of children, and days since the survey was launched. Covariates in Sample 3 are: age, household income, employment status, marital status, and number of children. Covariates in Sample 4 are: age, household income, employment status, household size, weekly work hours (apart from models with time-use work), education level, number of children, and days since the survey was launched. Covariates in Sample 5-7 are: age, household income, household size, education level, number of children, and days since the survey was launched. Covariates in Sample 8 are: age and days since survey was launched. Covariates in Sample 9 are: age, race, socio-economic status (composite of parental education and income), household size, and days since the survey was launched.

**Fig. S2h | Meta-Analysis: Gender Differences in Time Spent on Passive Leisure During COVID-19.**

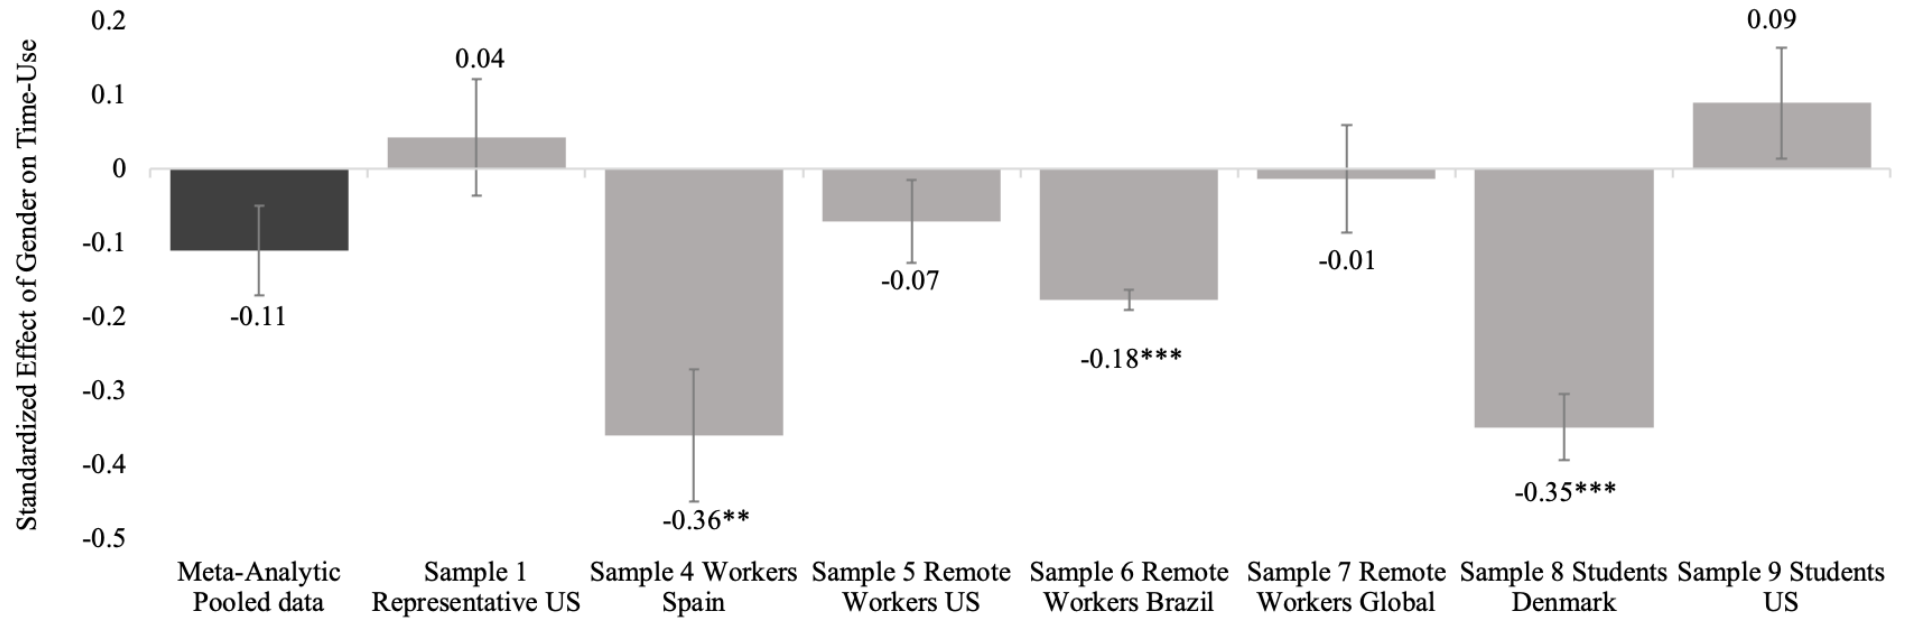

*Note.* Covariates in Sample 1 are: age, household income, employment status, marital status, and number of children. Covariates in Sample 2 are: age, employment status, marital status, number of children, and days since the survey was launched. Covariates in Sample 3 are: age, household income, employment status, marital status, and number of children. Covariates in Sample 4 are: age, household income, employment status, household size, education level, weekly work hours (apart from models with time-use work), number of children, and days since the survey was launched. Covariates in Sample 5-7 are: age, household income, household size, education level, number of children, and days since the survey was launched. Covariates in Sample 8 are: age and days since survey was launched. Covariates in Sample 9 are: age, race, socio-economic status (composite of parental education and income), household size, and days since the survey was launched.

**Fig. S2i | Meta-Analysis: Gender Differences in Time Spent on Paid Work + School Work (Samples 8-9) During COVID-19,**

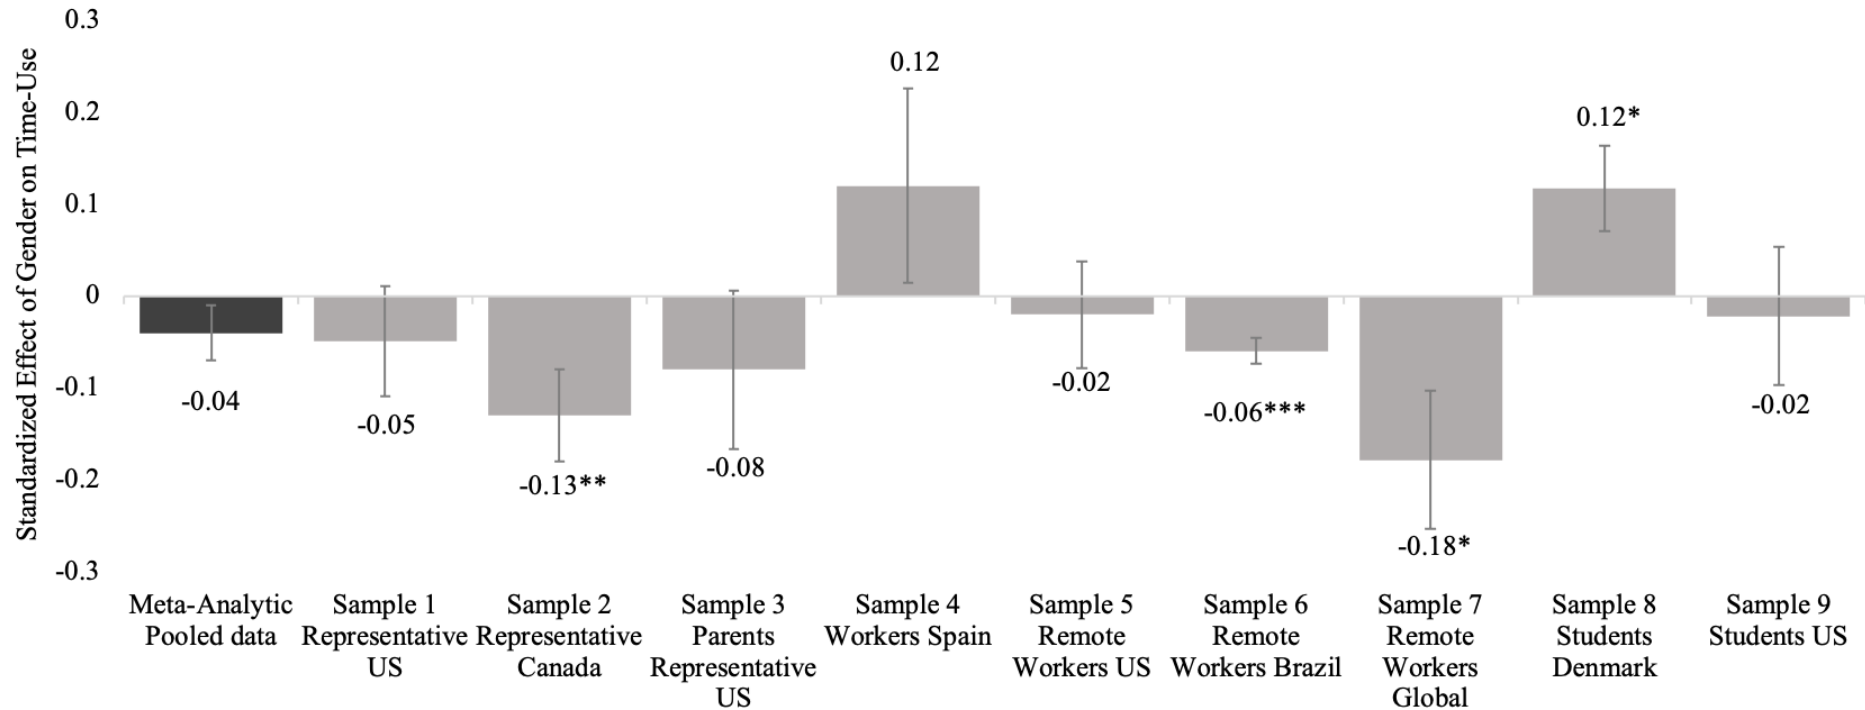

*Note.* Necessities is a composite of chores, caretaking, and/or family time. Covariates in Sample 1 are: age, household income, employment status, marital status, and number of children. Covariates in Sample 2 are: age, employment status, marital status, number of children, and days since the survey was launched. Covariates in Sample 3 are: age, household income, employment status, marital status, and number of children. Covariates in Sample 4 are: age, household income, employment status, household size, weekly work hours (apart from models with time-use work), education level, number of children, and days since the survey was launched. Covariates in Sample 5-7 are: age, household income, household size, education level, number of children, and days since the survey was launched. Covariates in Sample 8 are: age and days since survey was launched. Covariates in Sample 9 are: age, race, socio-economic status (composite of parental education and income), household size, and days since the survey was launched.

**Meta-Analyses: Gender X Parental Status Differences in Time-Use Across Samples (with Covariates)****Table S8a**

Standardized beta for gender (1=female) X parental status predicting time-use (with covariates)

| Sample   | Necessities          |      |      | Chores               |      |      | Caretaking/<br>Family time |      |      | Overall leisure      |      |      | Active leisure       |      |      | Passive leisure      |      |      | Work                 |      |      |
|----------|----------------------|------|------|----------------------|------|------|----------------------------|------|------|----------------------|------|------|----------------------|------|------|----------------------|------|------|----------------------|------|------|
|          | $\beta$<br>(p-value) | (se) | r    | $\beta$<br>(p-value) | (se) | r    | $\beta$<br>(p-value)       | (se) | r    | $\beta$<br>(p-value) | (se) | r    | $\beta$<br>(p-value) | (se) | r    | $\beta$<br>(p-value) | (se) | r    | $\beta$<br>(p-value) | (se) | r    |
| <b>1</b> |                      |      |      |                      |      |      |                            |      |      | -.20<br>(.098)       | .12  | -.08 | -.15<br>(.416)       | .18  | -.04 | -.12<br>(.465)       | .16  | -.04 | .20<br>(.098)        | .12  | .08  |
| <b>2</b> |                      |      |      |                      |      |      |                            |      |      |                      |      |      | .03<br>(.791)        | .02  | .01  |                      |      |      | -.02<br>(.844)       | .10  | -.01 |
| <b>4</b> | -.32<br>(.296)       | .31  | -.05 | -.10<br>(.774)       | .34  | -.01 | -.32<br>(.294)             | .31  | -.05 | .47<br>(.101)        | .29  | .08  | .09<br>(.765)        | .29  | .02  | .67<br>(.014)        | .27  | .12  | .28<br>(.400)        | .33  | .04  |
| <b>5</b> | .56<br><.001)        | .11  | .15  | .18<br>(.128)        | .12  | .04  | .52<br><.001)              | .11  | .14  | -.33<br>(.003)       | .11  | -.08 | -.18<br>(.124)       | .12  | -.04 | -.28<br>(.018)       | .12  | -.07 | -.19<br>(.101)       | .12  | -.05 |
| <b>6</b> | .25<br><.001)        | .03  | .07  | .18<br><.001)        | .03  | .05  | .21<br><.001)              | .03  | .06  | -.14<br><.001)       | .03  | -.04 | -.02<br>(.483)       | .03  | -.01 | -.15<br><.001)       | .03  | -.04 | -.12<br><.001)       | .03  | -.03 |
| <b>7</b> | .28<br>(.032)        | .13  | .08  | .43<br>(.002)        | .14  | .11  | .29<br>(.021)              | .14  | .08  | .02<br>(.861)        | .14  | .006 | .03<br>(.835)        | .14  | .01  | .02<br>(.870)        | .14  | .01  | -.20<br>(.179)       | .15  | -.05 |

*Note.*  $\beta$  = standardized regression beta; se = standard error;  $r$  = r-partial. Necessities is a composite of chores, caretaking, and/or family time. Overall leisure is a composite of active and passive leisure. Work is a composite of paid work and school work (Samples 8-9). Covariates in Sample 1 are: age, household income, employment status, marital status, and number of children. Covariates in Sample 2 are: age, employment status, marital status, number of children, and days since the survey was launched. Covariates in Sample 3 are: age, household income, employment status, marital status, and number of children. Covariates in Sample 4 are: age, household income, employment status, weekly work hours (apart from models with time-use work), household size, education level, number of children, and days since the survey was launched. Covariates in Sample 5-7 are: age, household income, household size, education level, number of children, and days since the survey was launched. Covariates in Sample 8 are: age and days since survey was launched. Covariates in Sample 9 are: age, race, socio-economic status (composite of parental education and income), household size, and days since the survey was launched.

**Table S8b**

Meta-Analysis of the Gender X Parental Status Interaction Term on Time-Use During COVID-19

| <b>Time-Use Composites</b>                  | <b>Included samples</b> | <b><math>\beta</math></b> | <b>SE</b> | <b>CI Lower limit</b> | <b>CI Upper limit</b> | <b>PI Lower limit</b> | <b>PI Upper limit</b> | <b>z-value</b> | <b>p-value</b> |
|---------------------------------------------|-------------------------|---------------------------|-----------|-----------------------|-----------------------|-----------------------|-----------------------|----------------|----------------|
| Necessities                                 | 4-7                     | .29                       | .13       | -.14                  | .72                   | -.40                  | .98                   | 2.17           | .030           |
| <i>Chores</i>                               | 4-7                     | .21                       | .05       | .04                   | .37                   | -.03                  | .45                   | 3.91           | <.0001         |
| <i>Caretaking + Caretaking /Family time</i> | 4-7                     | .27                       | .13       | -.15                  | .68                   | -.42                  | .95                   | 2.04           | .041           |
| <i>Caretaking /Family time</i>              | 5-7                     | .32                       | .09       | -.08                  | .73                   | -.44                  | 1.09                  | 3.44           | <.0001         |
| Overall leisure                             | 1, 4-7                  | -.13                      | .09       | -.38                  | .12                   | -.53                  | .28                   | -1.41          | .159           |
| Active leisure                              | 1-2, 4-7                | -.02                      | .02       | -.08                  | .03                   | -.08                  | .03                   | -1.27          | .204           |
| Passive leisure                             | 1, 4-7                  | -.07                      | .12       | -.41                  | .28                   | -.62                  | .49                   | -.55           | .581           |
| Work                                        | 1-2, 4-7                | -.06                      | .06       | -.22                  | .10                   | -.35                  | .23                   | -.96           | .339           |

*Note.* CI = confidence interval. PI = prediction interval. Given that caretaking among parents and non-parents was included only in Sample 4, we could not run a meta-analysis on this individual item as we did with gender differences in time-use. Necessities is a composite of chores, caretaking, and/or family time. Overall leisure is a composite of active and passive leisure. Work is a composite of paid work and school work (Samples 8-9). Covariates in Sample 1 are: age, household income, employment status, marital status, and number of children. Covariates in Sample 2 are: age, employment status, marital status, number of children, and days since the survey was launched. Covariates in Sample 3 are: age, household income, employment status, marital status, and number of children. Covariates in Sample 4 are: age, household income, employment status, household size, weekly work hours (apart from models with time-use work), education level, number of children, and days since the survey was launched. Covariates in Sample 5-7 are: age, household income, household size, education level, number of children, and days since the survey was launched. Covariates in Sample 8 are: age and days since survey was launched. Covariates in Sample 9 are: age, race, socio-economic status (composite of parental education and income), household size, and days since the survey was launched..



**Table S8c**

Sub-Group Meta-Analysis of Gender Among Parents vs. Non-Parents on Time-Use During COVID-19

|                                            | Included samples | NON-PARENTS |     |             |             |       |       | PARENTS |     |             |             |       |       |
|--------------------------------------------|------------------|-------------|-----|-------------|-------------|-------|-------|---------|-----|-------------|-------------|-------|-------|
|                                            |                  | $\beta$     | se  | CI          | PI          | z     | p     | $\beta$ | se  | CI          | PI          | z     | p     |
| Necessities                                | 4-7              | .15         | .08 | [-.10, .39] | [-.31, .60] | 1.90  | .058  | .44     | .06 | [.25, .63]  | [.13, .75]  | 7.27  | <.001 |
| Chores                                     | 4-7              | .16         | .08 | [-.09, .40] | [-.47, .78] | 2.05  | .040  | .34     | .07 | [.09, .42]  | [-.15, .66] | 3.71  | <.001 |
| Caretaking/<br>Family time                 | 5-7              | .05         | .01 | [-.01, .10] | [-.01, .10] | 3.78  | <.001 | .36     | .07 | [.04, .67]  | [-.24, .95] | 4.92  | <.001 |
| Caretaking +<br>Caretaking/<br>Family time | 4-7              | .04         | .04 | [-.08, .17] | [-.14, .23] | 1.10  | .271  | .33     | .06 | [.14, .51]  | [-.02, .68] | 5.62  | <.001 |
| Overall leisure                            | 1, 4-7           | -.11        | .07 | [-.42, .20] | [-.71, .49] | -.94  | .349  | -.22    | .08 | [-.46, .03] | [-.81, .38] | -2.64 | .008  |
| Active leisure                             | 1-2, 4-7         | -.08        | .07 | [-.26, .09] | [-.60, .43] | -1.21 | .226  | -.12    | .07 | [-.31, .07] | [-.67, .43] | -1.5  | .134  |
| Passive leisure                            | 1, 4-7           | -.06        | .06 | [-.39, .26] | [-.57, .44] | -.54  | .587  | -.15    | .06 | [-.32, .02] | [-.51, .21] | -2.45 | .014  |
| Work                                       | 1-2, 4-7         | -.03        | .03 | [-.09, .04] | [-.12, .07] | -1.08 | .279  | -.08    | .05 | [-.21, .05] | [-.32, .15] | -1.65 | .100  |

*Note.* CI = confidence interval. PI = prediction interval. Necessities is a composite of chores, caretaking, and/or family time. Overall leisure is a composite of active and passive leisure. Work is a composite of paid work. Covariates in Sample 1 are: age, household income, employment status, marital status, and number of children. Covariates in Sample 2 are: age, employment status, marital status, number of children, and days since the survey was launched. Covariates in Sample 4 are: age, household income, employment status, weekly work hours (apart from models with time-use work), household size, education level, number of children, and days since the survey was launched. Covariates in Sample 5-7 are: age, household income, household size, education level, number of children, and days since the survey was launched. Covariates in Sample 8 are: age and days since survey was launched. Covariates in Sample 9 are: age, race, socio-economic status (composite of parental education and income), household size, and days since the survey was launched.

**Fig. S3a | The meta-analytic effect of gender (1=women) and gender by parental status (1=yes) based on models with covariates.**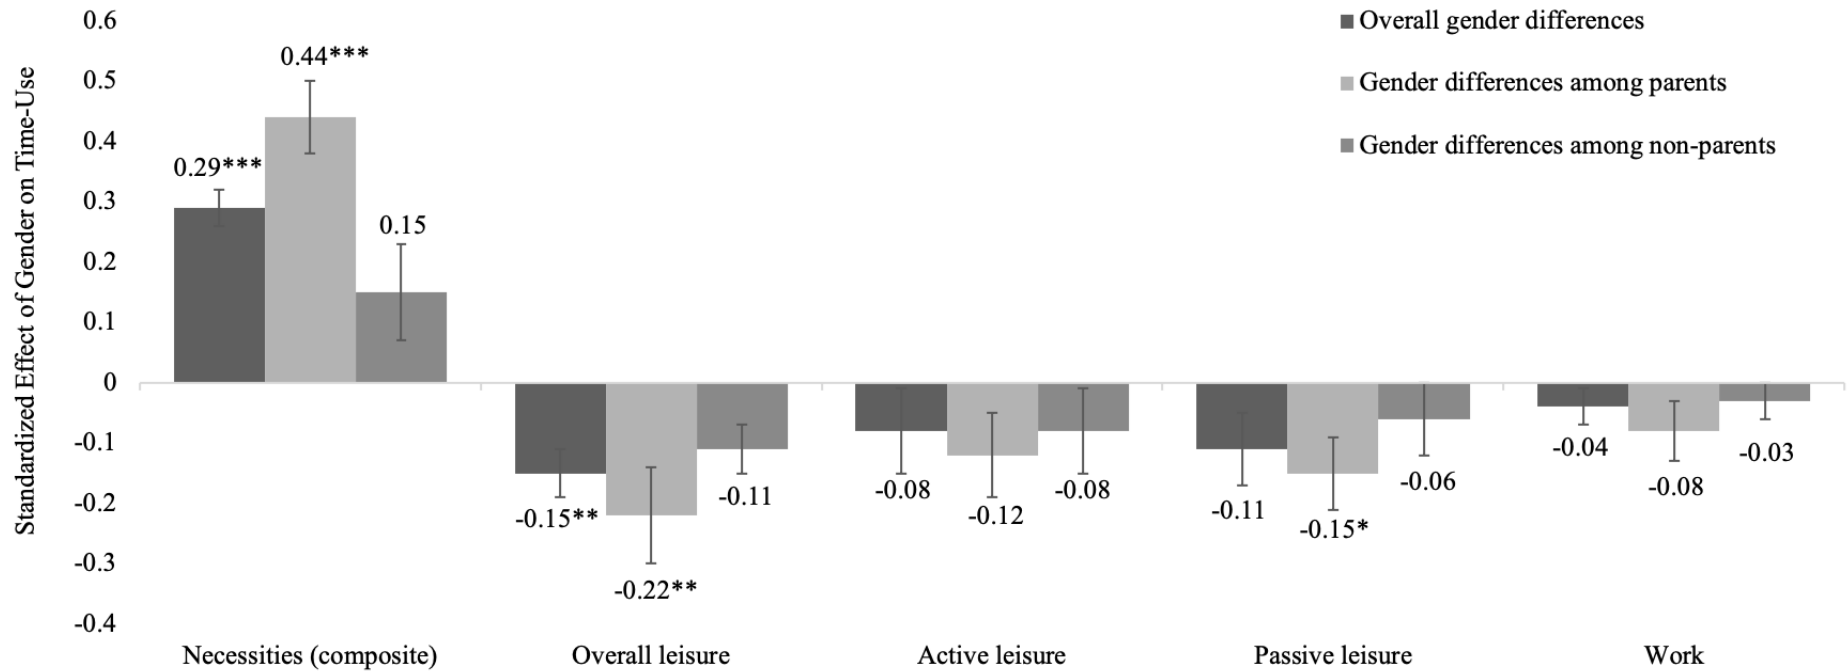

*Note.* For the necessities (composite) effect, we included Samples 4-7. For the overall leisure effect, we included Sample 1 and 4-8. For the active leisure effect, we included Samples 1-2, 4-7. For the passive leisure effect, we included Sample 1 and 4-7. For the work effect, we included Samples 1-2, 4-7. The most robust meta-analytic effect emerged for necessities among parents as indicated by the confidence and prediction interval that did not cross zero (see Table S19c for details and covariates included). Covariates in Sample 1 are: age, household income, employment status, marital status, and number of children. Covariates in Sample 2 are: age, employment status, marital status, number of children, and days since the survey was launched. Covariates in Sample 3 are: age, household income, employment status, marital status, and number of children. Covariates in Sample 4 are: age, household income, employment status, household size, weekly work hours (apart from models with time-use work), education level, number of children, and days since the survey was launched. Covariates in Sample 5-7 are: age, household income, household size, education level, number of children, and days since the survey was launched. Covariates in Sample 8 are: age and days since survey was launched. Covariates in Sample 9 are: age, race, socio-economic status (composite of parental education and income), household size, and days since the survey was launched.

**Fig. S4 | The meta-analytic effect of gender (1=women) and of gender by parental status (1=yes) based on models with covariates.**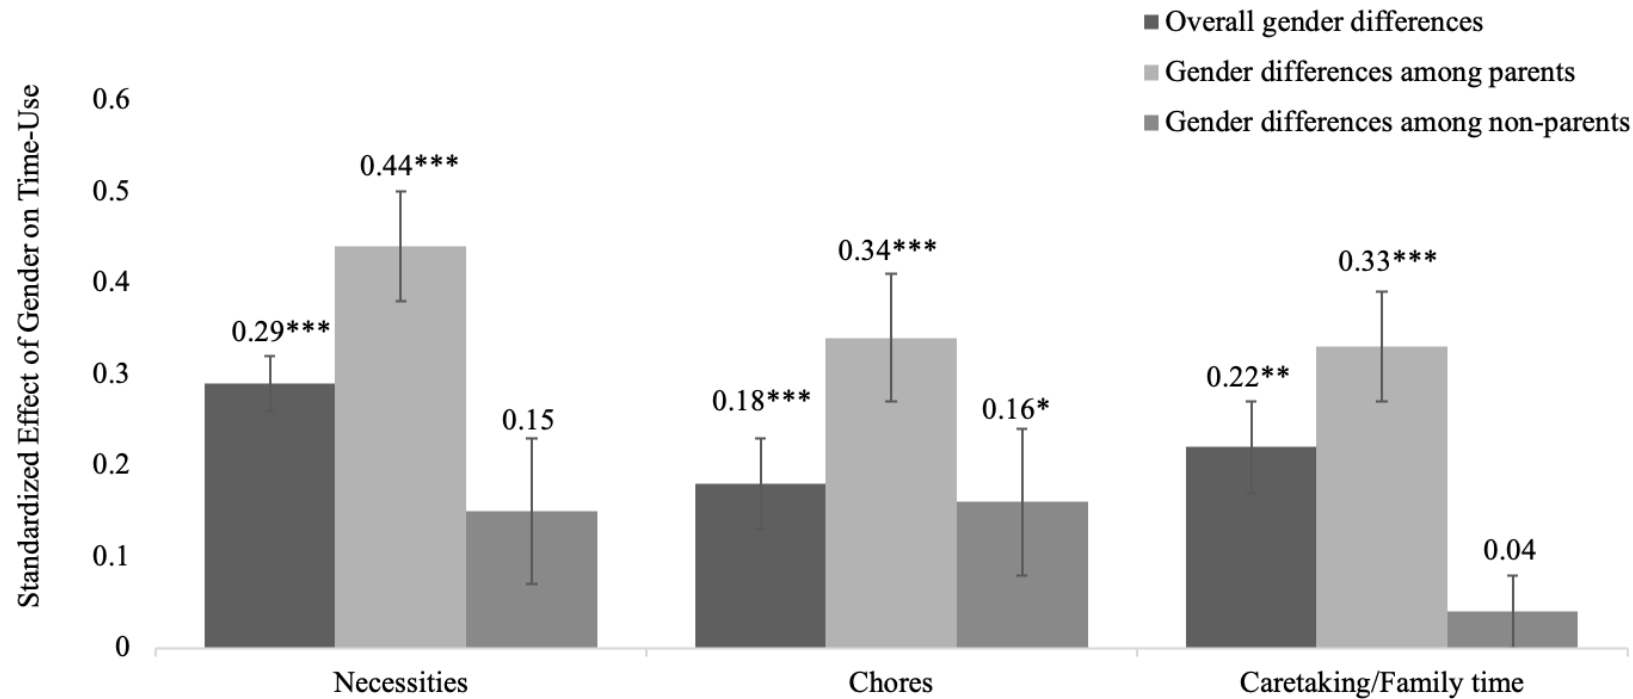

*Note.* Covariates in Sample 1 are: age, household income, employment status, marital status, and number of children. Covariates in Sample 2 are: age, employment status, marital status, number of children, and days since the survey was launched. Covariates in Sample 3 are: age, household income, employment status, marital status, and number of children. Covariates in Sample 4 are: age, household income, employment status, household size, weekly work hours (apart from models with time-use work), education level, number of children, and days since the survey was launched. Covariates in Sample 5-7 are: age, household income, household size, education level, number of children, and days since the survey was launched. Covariates in Sample 8 are: age and days since survey was launched. Covariates in Sample 9 are: age, race, socio-economic status (composite of parental education and income), household size, and days since the survey was launched.

**Meta-Analyses: Gender and Gender X Parental Status Differences in Happiness Across Samples (with Covariates)****Table S9a**

Standardized beta and r-partial for gender (1=female) predicting happiness (with covariates)

| Sample | Gender main effects  |      |      | Gendr X Parental Status |      |       |
|--------|----------------------|------|------|-------------------------|------|-------|
|        | $\beta$<br>(p-value) | (se) | r    | $\beta$<br>(p-value)    | (se) | r     |
| 1      | -.20<br>(.034)       | .10  | -.10 | .17<br>(.375)           | .19  | .04   |
| 2      | .01<br>(.860)        | .07  | .01  | .05<br>(.370)           | .14  | .01   |
| 3      | -.02<br>(.856)       | .11  | -.01 | --                      | --   | --    |
| 4      | -.05<br>(.632)       | .10  | -.02 | -.30<br>(.309)          | .29  | -.05  |
| 5      | .05<br>(.412)        | .06  | .02  | -.01<br>(.926)          | .12  | -.003 |
| 6      | .01<br>(.513)        | .01  | .05  | -.04<br>(.188)          | .03  | -.01  |
| 7      | .05<br>(.510)        | .07  | .02  | -.25<br>(.093)          | .15  | -.06  |
| 8      | .10<br>(.026)        | .05  | .04  | --                      | --   | --    |
| 9      | -.27<br>(<.001)      | .08  | -.12 | --                      | --   | --    |

*Note.*  $\beta$  = standardized regression beta; se = standard error;  $r$  = r-partial. Covariates in Sample 1 are: age, household income, employment status, marital status, and number of children. Covariates in Sample 2 are: age, employment status, marital status, number of children, and days since the survey was launched. Covariates in Sample 3 are: age, household income, employment status, marital status, and number of children. Covariates in Sample 4 are: age, household income, employment status, household size, education level, weekly work hours (apart from models with time-use work), number of children, and days since the survey was launched. Covariates in Sample 5-7 are: age, household income, household size, education level, number of children, and days since the survey was launched. Covariates in Sample 8 are: age and days since survey was launched. Covariates in Sample 9 are: age, race, socio-economic status (composite of parental education and income), household size, and days since the survey was launched.

**Table S9b**

Meta-Analysis of the Gender and Gender X Parental Status on Happiness During COVID-19

| <b>Time-Use Composites</b>           | <b>Included samples</b> | <b><math>\beta</math></b> | <b>SE</b> | <b>CI Lower limit</b> | <b>CI Upper limit</b> | <b>PI Lower limit</b> | <b>PI Upper limit</b> | <b>z-value</b> | <b>p-value</b> |
|--------------------------------------|-------------------------|---------------------------|-----------|-----------------------|-----------------------|-----------------------|-----------------------|----------------|----------------|
| Gender                               | 1-9                     | -.02                      | .04       | -.11                  | .07                   | -.20                  | .17                   | -.42           | .673           |
| Gender X Parental Status             | 1-2, 4-7                | -.04                      | .02       | -.10                  | .03                   | -.10                  | .03                   | -1.53          | .127           |
| <b>Sub-group moderation analysis</b> |                         |                           |           |                       |                       |                       |                       |                |                |
| Non-Parents                          | 1-2, 4-7                | .02                       | .05       | -.10                  | .14                   | -.17                  | .21                   | .047           | .640           |
| Parents                              | 1-2, 4-7                | -.02                      | .02       | -.06                  | .02                   | -.06                  | .02                   | -1.01          | .312           |
| Non-Parents                          | 1-7                     | .02                       | .02       | -.10                  | .14                   | -.17                  | .21                   | 1.62           | .105           |
| Parents                              | 1-7                     | -.02                      | .01       | -.05                  | .02                   | -.05                  | .02                   | -1.13          | .257           |

*Note.* CI = confidence interval. PI = prediction interval. Covariates in Sample 1 are: age, household income, employment status, marital status, and number of children. Covariates in Sample 2 are: age, employment status, marital status, number of children, and days since the survey was launched. Covariates in Sample 3 are: age, household income, employment status, marital status, and number of children. Covariates in Sample 4 are: age, household income, employment status, weekly work hours (apart from models with time-use work), household size, education level, number of children, and days since the survey was launched. Covariates in Sample 5-7 are: age, household income, household size, education level, number of children, and days since the survey was launched. Covariates in Sample 8 are: age and days since survey was launched. Covariates in Sample 9 are: age, race, socio-economic status (composite of parental education and income), household size, and days since the survey was launched.

**Fig. S5 | Gender differences in happiness.**

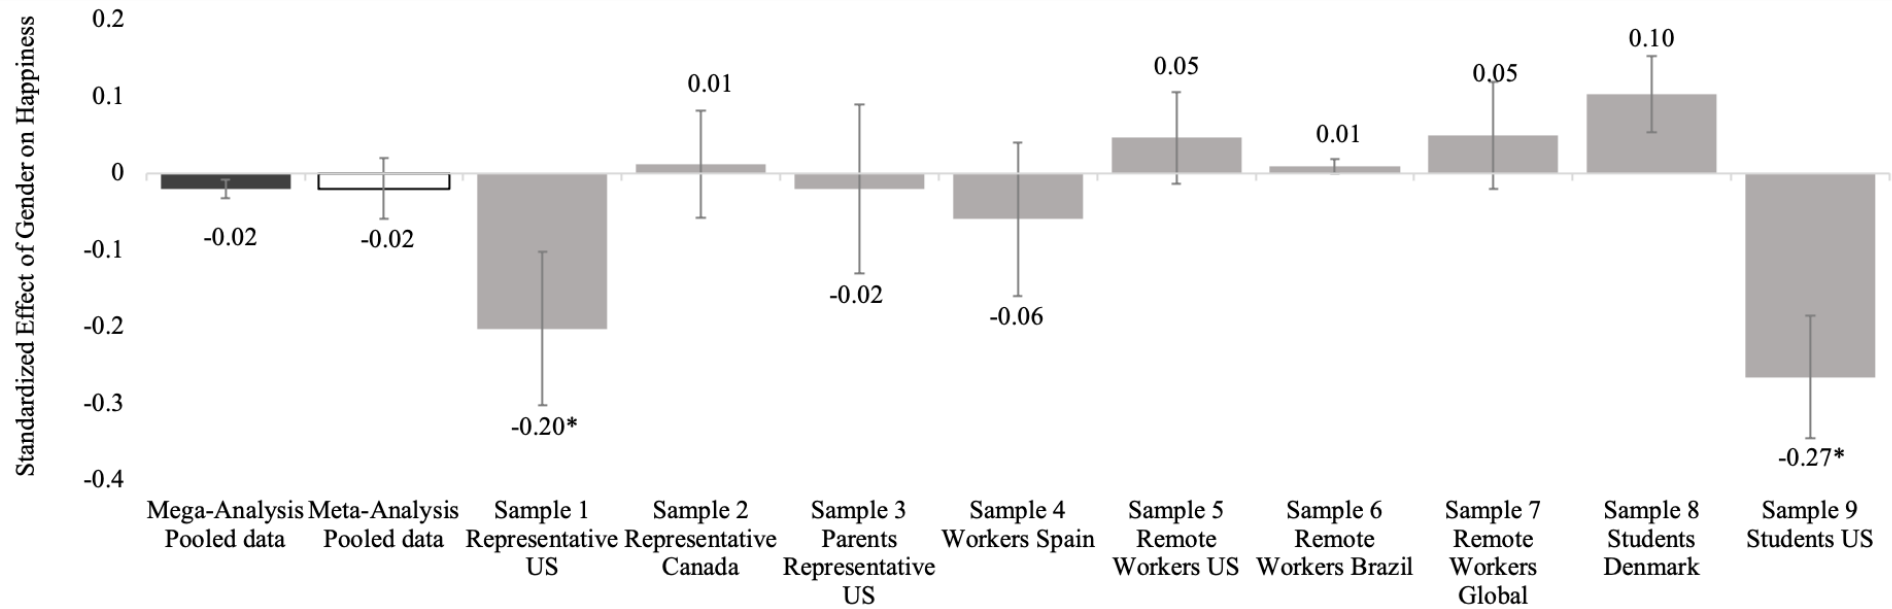

*Note.* The mega-analyses were conducted without covariates. The meta-analyses and the sample-specific effects are based on models with covariates as follows. Covariates in Sample 1 are: age, household income, employment status, marital status, and number of children. Covariates in Sample 2 are: age, employment status, marital status, number of children, and days since the survey was launched. Covariates in Sample 3 are: age, household income, employment status, marital status, and number of children. Covariates in Sample 4 are: age, household income, employment status, household size, weekly work hours (apart from models with time-use work), education level, number of children, and days since the survey was launched. Covariates in Sample 5-7 are: age, household income, household size, education level, number of children, and days since the survey was launched. Covariates in Sample 8 are: age and days since survey was launched. Covariates in Sample 9 are: age, race, socio-economic status (composite of parental education and income), household size, and days since the survey was launched.

**Meta-Analyses: Time-Use and Happiness Across Samples (with Covariates)****Table S10a**

Standardized beta for time-use predicting overall happiness (with covariates)

| Sample   | Necessities→<br>Happiness         |      |           | Chores→<br>Happiness              |      |          | Caretaking/<br>Family time→<br>Happiness |      |          | Overall leisure→<br>Happiness     |      |          | Active leisure→<br>Happiness      |      |          | Passive leisure→<br>Happiness     |      |          | Work→ Happiness                   |      |          |
|----------|-----------------------------------|------|-----------|-----------------------------------|------|----------|------------------------------------------|------|----------|-----------------------------------|------|----------|-----------------------------------|------|----------|-----------------------------------|------|----------|-----------------------------------|------|----------|
|          | $\beta$<br>( <i>p</i> -<br>value) | (se) | <i>r</i>  | $\beta$<br>( <i>p</i> -<br>value) | (se) | <i>r</i> | $\beta$<br>( <i>p</i> -<br>value)        | (se) | <i>r</i> | $\beta$<br>( <i>p</i> -<br>value) | (se) | <i>r</i> | $\beta$<br>( <i>p</i> -<br>value) | (se) | <i>r</i> | $\beta$<br>( <i>p</i> -<br>value) | (se) | <i>r</i> | $\beta$<br>( <i>p</i> -<br>value) | (se) | <i>r</i> |
| <b>1</b> | $\beta$<br>( <i>p</i> -<br>value) | (se) | <i>r</i>  | $\beta$<br>( <i>p</i> -<br>value) | (se) | <i>r</i> | $\beta$<br>( <i>p</i> -<br>value)        | (se) | <i>r</i> | $\beta$<br>( <i>p</i> -<br>value) | (se) | <i>r</i> | $\beta$<br>( <i>p</i> -<br>value) | (se) | <i>r</i> | $\beta$<br>( <i>p</i> -<br>value) | (se) | <i>r</i> | $\beta$<br>( <i>p</i> -<br>value) | (se) | <i>r</i> |
| <b>2</b> |                                   |      |           |                                   |      |          |                                          |      |          | -.12<br>(.128)                    | .08  | -.07     | .01<br>(.038)                     | .00  | .10      | -.001<br>(.002)                   | .00  | -.15     | .00<br>(.128)                     | .00  | .07      |
| <b>3</b> |                                   |      |           |                                   |      |          |                                          |      |          |                                   |      |          |                                   |      |          |                                   |      |          | -.05<br>(.407)                    | .06  | -.03     |
| <b>4</b> | .002<br>(.968)                    | .06  | -<br>.002 | -.03<br>(.598)                    | .05  | -.03     | .02<br>(.770)                            | .06  | .02      | .13<br>(.013)                     | .05  | .13      | .04<br>(.437)                     | .06  | .03      |                                   |      |          | -.06<br>(.367)                    | .06  | -.05     |
| <b>5</b> | -.05<br>(.467)                    | .06  | -.04      | -.21<br>(.667)                    | .05  | -.21     | -.04<br>(.566)                           | .06  | -.04     | .16<br>(.002)                     | .05  | .15      | .17<br>(.001)                     | .05  | .17      | -.04<br>(.417)                    | .05  | -.04     | -.10<br>(.051)                    | .05  | -.10     |
| <b>6</b> | -.04<br>(.186)                    | .03  | -.04      | -.09<br>(.002)                    | .03  | -.09     | .00<br>(.931)                            | .03  | .00      | -.07<br>(.021)                    | .03  | -.06     | .23<br>( <i>&lt;.001</i> )        | .05  | .22      | -.15<br>( <i>&lt;.001</i> )       | .03  | -.15     | .02<br>(.051)                     | .03  | .02      |
| <b>7</b> | -.02<br>(.003)                    | .01  | -.02      | -.10<br>( <i>&lt;.001</i> )       | .01  | -.10     | .03<br>( <i>&lt;.001</i> )               | .01  | .03      | .01<br>(.067)                     | .01  | .01      | .08<br>(.002)                     | .03  | .09      | -.07<br>( <i>&lt;.001</i> )       | .01  | -.07     | -.04<br>(.388)                    | .01  | -.04     |
| <b>8</b> | .05<br>(.224)                     | .04  | .04       | -.03<br>(.418)                    | .04  | -.03     | .09<br>(.02)                             | .04  | .09      | -.03<br>(.383)                    | .04  | -.03     | .10<br>( <i>&lt;.001</i> )        | .01  | .10      | -.09<br>( <i>&lt;.001</i> )       | .04  | -.10     | -.04<br>( <i>&lt;.001</i> )       | .04  | -.04     |
| <b>9</b> |                                   |      |           |                                   |      |          |                                          |      |          | -.20<br>(.313)                    | .02  | -.02     | .07<br>( <i>&lt;.001</i> )        | .04  | .07      | -.17<br>( <i>&lt;.001</i> )       | .02  | -.17     | .02<br>(.316)                     | .02  | .02      |

*Note.*  $\beta$  = standardized regression beta; se = standard error; *r* = *r*-partial. Necessities is a composite of chores, caretaking, and/or family time. Overall leisure is a composite of active and passive leisure. Work is a composite of paid work and school work (Samples 8-9). Covariates in Sample 1 are: age, household income, employment status, marital status, and number of children. Covariates in Sample 2 are: age, employment status, marital status, number of children, and days since the survey was launched. Covariates in Sample 3 are: age, household income, employment status, marital status, and number of children. Covariates in Sample 4 are: age, household income, employment status, weekly work hours (apart from models with time-use work), household size, education level, number of children, and days since the survey was launched. Covariates in Sample 5-7 are: age, household income, household size, education level, number of children, and days since the survey was launched. Covariates in Sample 8 are: age and days since survey was launched. Covariates in Sample 9 are: age, race, socio-economic status (composite of parental education and income), household size, and days since the survey was launched. See Meta-Analysis files on OSF for additional details and sample-specific analyses.

**Table S10b**

Meta-Analysis of Time-Use on Overall Happiness (with covariates)

| <b>Time-Use Composites</b>                  | <b>Included samples</b> | <b><math>\beta</math></b> | <b>SE</b> | <b>CI Lower limit</b> | <b>CI Upper limit</b> | <b>PI Lower limit</b> | <b>PI Upper limit</b> | <b>z-value</b> | <b>p-value</b> |
|---------------------------------------------|-------------------------|---------------------------|-----------|-----------------------|-----------------------|-----------------------|-----------------------|----------------|----------------|
| Necessities                                 | 3-7, 9                  | -.02                      | .01       | -.04                  | .01                   | -.04                  | .01                   | -1.94          | .026           |
| <i>Chores</i>                               | 3-7, 9                  | -.08                      | .03       | -.15                  | -.01                  | -.21                  | .06                   | -2.81          | .005           |
| <i>Caretaking + Caretaking /Family time</i> | 3-7                     | .03                       | .01       | -.01                  | .07                   | -.03                  | .08                   | 1.88           | .060           |
| <i>Caretaking /Family time</i>              | 3-4                     | -.01                      | .03       | -.39                  | .37                   | -.39                  | .37                   | -.33           | .739           |
| <i>Caretaking</i>                           | 5-7                     | .3                        | .02       | -.06                  | .12                   | -.10                  | .16                   | 1.53           | .125           |
| Overall leisure                             | 1, 3-9                  | -.01                      | .04       | -.11                  | .1                    | -.29                  | .28                   | -.16           | .875           |
| Active leisure                              | 1-9                     | .12                       | .03       | .06                   | .19                   | -.08                  | .33                   | 4.44           | <.001          |
| Passive leisure                             | 1, 4-9                  | -.09                      | .02       | -.14                  | -.04                  | -.26                  | .08                   | -4.07          | <.001          |
| Work                                        | 1-9                     | -.01                      | .01       | -.04                  | .02                   | -.08                  | .05                   | -1.01          | .312           |

*Note.* CI = confidence interval. PI = prediction interval. Necessities is a composite of chores, caretaking, and/or family time. Overall leisure is a composite of active and passive leisure. Work is a composite of paid work and school work (Samples 8-9). Covariates in Sample 1 are: age, household income, employment status, marital status, and number of children. Covariates in Sample 2 are: age, employment status, marital status, number of children, and days since the survey was launched. Covariates in Sample 3 are: age, household income, employment status, marital status, and number of children. Covariates in Sample 4 are: age, household income, employment status, household size, weekly work hours (apart from models with time-use work), education level, number of children, and days since the survey was launched. Covariates in Sample 5-7 are: age, household income, household size, education level, number of children, and days since the survey was launched. Covariates in Sample 8 are: age and days since survey was launched. Covariates in Sample 9 are: age, race, socio-economic status (composite of parental education and income), household size, and days since the survey was launched.



### Mega-Analyses Results

**Table S11a.** Comparing Mega-Analysis Models with a Random Intercept vs. Random Slope Using Likelihood Ratio Tests

| DV                      | IV                      | <i>chi2</i> | <i>p-value</i> |
|-------------------------|-------------------------|-------------|----------------|
| Happiness               | Gender                  | 4.80        | 0.0907         |
| Neccesities (composite) | Gender                  | 0.0651      | 0.0033         |
| Chores                  | Gender                  | 52.83       | 0.000          |
| Caretaking/Family Time  | Gender                  | 23.81       | 0.000          |
| Overall leisure         | Gender                  | 90.42       | 0.000          |
| Active Leisure          | Gender                  | 146.99      | 0.000          |
| Passive Leisure         | Gender                  | 36.42       | 0.000          |
| Work                    | Gender                  | 14.41       | 0.001          |
| Happiness               | Neccesities (composite) | 3.22        | 0.073          |
| Happiness               | Overall leisure         | 22.04       | 0.000          |
| Happiness               | Work                    | 10.74       | 0.001          |
| Happiness               | Chores                  | 196.91      | 0.000          |
| Happiness               | Caretaking/Family Time  | 10.86       | 0.001          |
| Happiness               | Active Leisure          | 39.31       | 0.000          |
| Happiness               | Passive Leisure         | 24.92       | 0.000          |

*Note.* We tested the null hypothesis that there is no significant difference between the models i) a random intercept model of the IV predicting DV and ii) a random intercept and slope model of the IV predicting DV. The rejection of the null ( $p$ -value < .05) suggests that adding the random slope to the random intercept model improves the fit of the model. Unstructured covariances were used in all random slope models except for the model with active leisure where an independent covariance structure was used due to the convergence issues which are common with unstructured covariances (Boedhoe et al., 2019).

**Table S11b.** Mega-Analysis Findings for Differences in Happiness and Time Use by Gender (Without Covariates)

|                               | <b>Effect Size</b> | <b>95% CI</b>  | <b>Two-tailed p-value</b> |
|-------------------------------|--------------------|----------------|---------------------------|
| <b>Happiness</b>              | -0.02              | [-0.041,0.004] | 0.103                     |
| <b>Necessities</b>            | 0.28               | [0.135,0.419]  | 0.000                     |
| <b>Overall Leisure</b>        | -0.08              | [-0.187,0.030] | 0.158                     |
| <b>Work</b>                   | -0.08              | [-0.170,0.015] | 0.100                     |
| <i>Necessities</i>            |                    |                |                           |
| <b>Chores</b>                 | 0.24               | [0.141,0.344]  | 0.000                     |
| <b>Caretaking/Family Time</b> | 0.22               | [0.020,0.411]  | 0.031                     |
| <i>Leisure</i>                |                    |                |                           |
| <b>Active Leisure</b>         | -0.05              | [-0.168,0.071] | 0.429                     |
| <b>Passive Leisure</b>        | -0.09              | [-0.222,0.049] | 0.213                     |

*Note.* CI= confidence interval. Beta estimates represent coefficients in standard deviation units. Pooled data from 9 samples were used in the analysis. Necessities, chores and caretaking were not measured in Samples 1, 2 and 8. Passive leisure was not measured in Samples 2 and 3. Overall leisure is a composite of active and passive leisure. Work is paid work except for Samples 8-9 where it is paid work and schoolwork. Caretaking/family time was measured as 'taking care of family (kids or elderly) in Samples 3 and 4, and 'taking care of others or spending time with family' in Samples 5, 6, and 7. Random slope models were used in mega-analysis of pooled data for necessities, overall leisure, active leisure, passive leisure, chores, caretaking/family time and work. Covariances were unstructured (except for active leisure where an independent covariance was specified). The main effects for necessities remain robust after applying Bonferroni corrections, that is, using an alpha/5 in evaluating the statistical significance of 5 time use models that we preregistered (necessities, overall leisure, active leisure, passive leisure, work).

**Table S11c.**

Mega-Analysis of Differences in Happiness and Time Use by Gender X Parental Status (Without Covariates)

|                                   | Estimate<br>for Gender<br>X Parents<br>Interaction | 95% CI          | Two-tailed<br>p-value | Estimate<br>for<br>Gender<br>(Parents<br>= 1) | 95% CI          | p-<br>value | Estimate<br>for<br>Gender<br>(Parents<br>= 0) | 95% CI         | Two-<br>tailed p-<br>value |
|-----------------------------------|----------------------------------------------------|-----------------|-----------------------|-----------------------------------------------|-----------------|-------------|-----------------------------------------------|----------------|----------------------------|
| <b>Happiness</b>                  | -0.030                                             | [-0.083,0.015]  | 0.180                 | -0.04                                         | [-0.078,-0.004] | 0.030       | -0.01                                         | [-0.040,0.025] | 0.652                      |
| <b>Necessities</b>                | 0.25                                               | [0.199,0.294]   | 0.000                 | 0.48                                          | [0.365,0.597]   | 0.000       | 0.23                                          | [0.119,0.349]  | 0.000                      |
| <b>Total Leisure</b>              | -0.13                                              | [-0.174,-0.077] | 0.000                 | -0.15                                         | [-0.292,0.001]  | 0.052       | -0.02                                         | [-0.168,0.128] | 0.791                      |
| <b>Work</b>                       | -0.10                                              | [-0.152,-0.053] | 0.000                 | -0.18                                         | [-0.269,-0.083] | 0.000       | -0.07                                         | [-0.168,0.020] | 0.125                      |
| <i>Necessities</i>                |                                                    |                 |                       |                                               |                 |             |                                               |                |                            |
| <b>Chores</b>                     | 0.17                                               | [0.117,0.216]   | 0.000                 | 0.33                                          | [0.204,0.463]   | 0.000       | 0.17                                          | [0.036,0.298]  | 0.012                      |
| <b>Caretaking/Family<br/>Time</b> | 0.20                                               | [0.150,0.249]   | 0.000                 | 0.34                                          | [0.181,0.509]   | 0.000       | 0.15                                          | [-0.020,0.310] | 0.085                      |
| <i>Leisure</i>                    |                                                    |                 |                       |                                               |                 |             |                                               |                |                            |
| <b>Active Leisure</b>             | -0.03                                              | [-0.079,0.020]  | 0.245                 | -0.11                                         | [-0.223,0.004]  | 0.060       | -0.08                                         | [-0.195,0.035] | 0.172                      |
| <b>Passive Leisure</b>            | -0.14                                              | [-0.192,-0.093] | 0.000                 | -0.12                                         | [-0.247,-0.003] | 0.044       | 0.02                                          | [-0.105,0.139] | 0.781                      |

*Note.* CI= confidence interval. Beta estimates represent coefficients in standard deviation units. Pooled data from 9 samples were used in the analysis. Necessities, chores and caretaking were not measured in Samples 1, 2 and 8. Passive leisure was not measured in Samples 2 and 3. Overall leisure is a composite of active and passive leisure. Work is paid work except for Samples 8-9 where it is paid work and schoolwork. Caretaking/family time was measured as 'taking care of family (kids or elderly) in Samples 3 and 4, and 'taking care of others or spending time with family' in Samples 5, 6, and 7. Random slope models were used in mega-analysis of pooled data for necessities, overall leisure, active leisure, passive leisure, chores, caretaking/family time and work. Covariances were unstructured (except for active leisure where an independent covariance was specified). Estimates for parents=1 or parents=0 were retrieved from the interaction model using the postestimation commands (marginsplot) in Stata 15.1.

**Table S11d.**

Mega-Analysis Findings for the Relationship Between Happiness and Time Use (Without Covariates)

|                               | <b>Effect Size</b> | <b>95% CI</b>   | <b>Two-tailed p-value</b> |
|-------------------------------|--------------------|-----------------|---------------------------|
| <b>Necessities</b>            | 0.00               | [-.003, .003]   | 0.925                     |
| <b>Overall Leisure</b>        | -0.05              | [-.054, -.042]  | 0.000                     |
| <b>Work</b>                   | 0.01               | [.004, .008]    | 0.000                     |
| <i>Necessities</i>            |                    |                 |                           |
| <b>Chores</b>                 | -0.03              | [-.043, -.025]  | 0.000                     |
| <b>Caretaking/Family Time</b> | -0.07              | [-.082, -.060]  | 0.000                     |
| <b>Caretaking</b>             | 0.00               | [-.002, .007]   | 0.218                     |
| <i>Leisure</i>                |                    |                 |                           |
| <b>Active Leisure</b>         | 0.01               | [ .005, .013]   | 0.000                     |
| <b>Passive Leisure</b>        | -0.04              | [ -.045, -.030] | 0.000                     |

*Note.* CI= confidence interval. Beta estimates represent coefficients in standard deviation units. Pooled data from 9 samples were used in the analysis. Necessities, chores and caretaking were not measured in Samples 1, 2 and 8. Passive leisure was not measured in Samples 2 and 3. Overall leisure is a composite of active and passive leisure. Work is paid work except for Samples 8-9 where it is paid work and schoolwork. Caretaking/family time was measured as 'taking care of family (kids or elderly) in Samples 3 and 4, and 'taking care of others or spending time with family' in Samples 5, 6, and 7. The caretaking analysis was restricted to Sample 3 to capture the pure measure of taking care of family. Guided by ikelihood ratio tests, random slopes were used in all models and random intercept model was used when necessities was a predictor.. Covariances were unstructured (except for active leisure where an independent covariance was specified). The main effects for chores remain robust after applying Bonferroni corrections, which involve using an alpha/5 for testing 5 time use models that we preregistered (necessities, overall leisure, active leisure, passive leisure, work) in evaluating the statistical significance.

**Table S11e.**

Indirect Effects from Gender to Happiness via Time Use in Mega-Analysis

| Full Sample               | Mediator                      | Without Covariates |                |                    | With Covariates |                |                    |
|---------------------------|-------------------------------|--------------------|----------------|--------------------|-----------------|----------------|--------------------|
|                           |                               | Estimate           | 95% CI         | Two-tailed p-value | Estimate        | 95% CI         | Two-tailed p-value |
| <i>Single mediator</i>    | <b>Necessities</b>            | 0.00               | [-.003, .003]  | 0.925              | 0.00            | [-.005, .003]  | 0.548              |
| <i>Multiple mediators</i> | <b>Chores</b>                 | -0.05              | [-.054, -.042] | 0.000              | -0.05           | [-.057, -.045] | 0.000              |
|                           | <b>Caretaking/Family Time</b> | 0.01               | [.004, .008]   | 0.000              | 0.01            | [.004, .009]   | 0.000              |
| <b>Among Parents</b>      |                               |                    |                |                    |                 |                |                    |
| <i>Single mediator</i>    | <b>Necessities</b>            | -0.03              | [-.043, -.025] | 0.000              | -0.03           | [-.040, -.024] | 0.000              |
| <i>Multiple mediators</i> | <b>Chores</b>                 | -0.07              | [-.082, -.060] | 0.000              | -0.07           | [-.082, -.061] | 0.000              |
|                           | <b>Caretaking/Family Time</b> | 0.00               | [-.002, .007]  | 0.218              | 0.00            | [-.000, .006]  | 0.147              |
| <b>Among Non-Parents</b>  |                               |                    |                |                    |                 |                |                    |
| <i>Single mediator</i>    | <b>Necessities</b>            | 0.01               | [.005, .013]   | 0.000              | 0.01            | [.004, .012]   | 0.000              |
| <i>Multiple mediators</i> | <b>Chores</b>                 | -0.04              | [-.045, -.030] | 0.000              | -0.04           | [-.049, -.034] | 0.000              |
|                           | <b>Caretaking/Family Time</b> | 0.00               | [-.004, .005]  | 0.812              | 0.00            | [-.002, .006]  | 0.231              |

Note. CI= confidence interval. Beta estimates represent coefficients in standard deviation units. Pooled data from 6 samples were used in the analysis (necessities, chores and caretaking were not measured in Samples 1, 2 and 8). Generalized structural equation modeling with random intercepts were used. Indirect effects were calculated by using the nlcom command on Stata 15.1.

**Table S11f.**

Differences in Happiness and Time Use by Gender (Without Covariates)

|             | <i>Happiness</i> |                 |                | <i>Necessities</i> |               |                | <i>Chores</i> |                |                | <i>Caretaking/Family Time</i> |                |                |
|-------------|------------------|-----------------|----------------|--------------------|---------------|----------------|---------------|----------------|----------------|-------------------------------|----------------|----------------|
|             | <b>beta</b>      | <b>95% CI</b>   | <b>p-value</b> | <b>beta</b>        | <b>95% CI</b> | <b>P-value</b> | <b>beta</b>   | <b>95% CI</b>  | <b>p-value</b> | <b>beta</b>                   | <b>95% CI</b>  | <b>P-value</b> |
| Pooled data | -0.02            | [-0.041,0.004]  | 0.103          | 0.28               | [0.135,0.419] | 0.000          | 0.24          | [0.141,0.344]  | 0.000          | 0.22                          | [0.020,0.411]  | 0.031          |
| Sample 1    | -0.2             | [-0.386,-0.011] | 0.038          | NA                 | NA            | NA             | NA            | NA             | NA             | NA                            | NA             | NA             |
| Sample 2    | -0.06            | [-0.203,0.078]  | 0.383          | NA                 | NA            | NA             | NA            | NA             | NA             | NA                            | NA             | NA             |
| Sample 3    | -0.15            | [-0.346,0.047]  | 0.136          | 0.73               | [0.545,0.912] | 0.000          | 0.27          | [0.080,0.470]  | 0.006          | 0.70                          | [0.517,0.886]  | 0.000          |
| Sample 4    | -0.04            | [-0.189,0.101]  | 0.551          | 0.21               | [0.049,0.371] | 0.011          | 0.13          | [-0.035,0.286] | 0.126          | 0.18                          | [0.019,0.341]  | 0.029          |
| Sample 5    | -0.01            | [-0.112,0.098]  | 0.898          | 0.12               | [0.012,0.223] | 0.029          | 0.13          | [0.028,0.241]  | 0.014          | 0.09                          | [-0.018,0.196] | 0.105          |
| Sample 6    | -0.02            | [-0.046,0.007]  | 0.148          | 0.27               | [0.247,0.300] | 0.000          | 0.44          | [0.413,0.465]  | 0.000          | 0.05                          | [0.028,0.082]  | 0.000          |
| Sample 7    | 0.04             | [-0.094,0.166]  | 0.587          | 0.24               | [0.106,0.367] | 0.000          | 0.27          | [0.143,0.405]  | 0.000          | 0.14                          | [0.005,0.269]  | 0.042          |
| Sample 8    | 0.1              | [0.022,0.185]   | 0.013          | NA                 | NA            | NA             | NA            | NA             | NA             | NA                            | NA             | NA             |
| Sample 9    | -0.26            | [-0.409,-0.117] | 0.000          | 0.25               | [0.099,0.392] | 0.001          | 0.17          | [0.025,0.318]  | 0.021          | NA                            | NA             | NA             |

*Note.* Beta estimates represent coefficients in standard deviation units. Random slope models were used in mega-analysis of pooled data for necessities, chores and taking care of others. Covariances were unstructured. Random intercept model was used for the mega-analysis of happiness. Linear regression analysis was used in sample-specific analysis. Taking Care of Others V1 was measured by a question that assessed 'taking care of others' in Samples 3 and 4, and a question that assessed 'taking care of others or spending time with family' in Samples 5, 6, and 7.

**Table S11g.**  
Differences in Happiness and Time Use by Gender (Without Covariates)

|             | <i>Total Leisure</i> |                 |         | <i>Active Leisure</i> |                 |         | <i>Passive Leisure</i> |                 |         | <i>Work</i> |                 |         |
|-------------|----------------------|-----------------|---------|-----------------------|-----------------|---------|------------------------|-----------------|---------|-------------|-----------------|---------|
|             | beta                 | 95% CI          | p-value | beta                  | 95% CI          | P-value | beta                   | 95% CI          | p-value | beta        | 95% CI          | P-value |
| Pooled data | -0.24                | [-0.262,-0.216] | 0.000   | -0.05                 | [-0.168,0.071]  | 0.429   | -0.09                  | [-0.222,0.049]  | 0.213   | -0.08       | [-0.170,0.015]  | 0.100   |
| Sample 1    | 0.22                 | [0.035,0.411]   | 0.020   | 0.13                  | [-0.063,0.314]  | 0.193   | 0.17                   | [-0.020,0.357]  | 0.08    | -0.22       | [-0.411,-0.035] | 0.020   |
| Sample 2    | 0.16                 | [0.010,0.302]   | 0.036   | 0.16                  | [0.010,0.302]   | 0.036   | NA                     | NA              | NA      | -0.15       | [-0.295,-0.003] | 0.045   |
| Sample 3    | -0.36                | [-0.553,-0.165] | 0.000   | -0.36                 | [-0.553,-0.165] | 0.000   | NA                     | NA              | NA      | -0.41       | [-0.599,-0.213] | 0.000   |
| Sample 4    | -0.15                | [-0.307,0.014]  | 0.073   | 0.09                  | [-0.074,0.249]  | 0.286   | -0.35                  | [-0.511,-0.194] | 0.000   | 0.09        | [-0.074,0.248]  | 0.291   |
| Sample 5    | -0.08                | [-0.182,0.029]  | 0.158   | -0.12                 | [-0.225,-0.016] | 0.024   | 0.000                  | [-0.102,0.110]  | 0.942   | 0.000       | [-0.101,0.109]  | 0.940   |
| Sample 6    | -0.3                 | [-0.329,-0.276] | 0.000   | -0.29                 | [-0.314,-0.261] | 0.000   | -0.15                  | [-0.182,-0.128] | 0.000   | -0.04       | [-0.070,-0.017] | 0.001   |
| Sample 7    | 0.03                 | [-0.102,0.159]  | 0.668   | -0.02                 | [-0.148,0.112]  | 0.787   | 0.05                   | [-0.078,0.185]  | 0.426   | -0.2        | [-0.328,-0.066] | 0.003   |
| Sample 8    | -0.12                | [-0.208,-0.034] | 0.007   | 0.25                  | [0.158,0.332]   | 0.000   | -0.35                  | [-0.431,-0.259] | 0.000   | 0.12        | [0.031,0.205]   | 0.008   |
| Sample 9    | -0.11                | [-0.260,0.036]  | 0.136   | -0.26                 | [-0.406,-0.111] | 0.001   | 0.08                   | [-0.067,0.228]  | 0.286   | -0.02       | [-0.173,0.124]  | 0.744   |

*Note.* Beta estimates represent coefficients in standard deviation units. Random slope models were used in mega-analysis of pooled data for total leisure, active leisure, passive leisure and work. Covariance was unstructured for total leisure, passive leisure, and work; and independent for active leisure. Linear regression analysis was used in sample-specific analysis. Taking Care of Others V1 was measured by a question that assessed 'taking care of others' in Samples 3 and 4, and a question that assessed 'taking care of others or spending time with family' in Samples 5, 6, and 7.

**Table S11h.**  
Differences in Happiness and Time Use by Gender (Without Covariate)

|             | <i>Taking Care of Family</i> |               |                | <i>Caretaking/Family Time</i> |                |                |
|-------------|------------------------------|---------------|----------------|-------------------------------|----------------|----------------|
|             | <b>beta</b>                  | <b>95% CI</b> | <b>p-value</b> | <b>beta</b>                   | <b>95% CI</b>  | <b>P-value</b> |
| Pooled data | NA                           | NA            | NA             | NA                            | NA             | NA             |
| Sample 1    | NA                           | NA            | NA             | NA                            | NA             | NA             |
| Sample 2    | NA                           | NA            | NA             | NA                            | NA             | NA             |
| Sample 3    | 0.7                          | [0.517,0.886] | 0.000          | NA                            | NA             | NA             |
| Sample 4    | 0.18                         | [0.019,0.341] | 0.029          | NA                            | NA             | NA             |
| Sample 5    | NA                           | NA            | NA             | 0.09                          | [-0.018,0.196] | 0.105          |
| Sample 6    | NA                           | NA            | NA             | 0.05                          | [0.028,0.082]  | 0.000          |
| Sample 7    | NA                           | NA            | NA             | 0.14                          | [0.005,0.269]  | 0.042          |
| Sample 8    | NA                           | NA            | NA             | NA                            | NA             | NA             |
| Sample 9    | NA                           | NA            | NA             | NA                            | NA             | NA             |

*Note.* Beta estimates represent coefficients in standard deviation units. Linear regression analysis was used in sample-specific analysis. Taking Care of Others VI was measured by a question that assessed 'taking care of others' in Samples 3 and 4, and a question that assessed 'taking care of others or spending time with family' in Samples 5, 6, and 7.



**Table S11i.**

Mega-Analysis Findings for the Relationship Between Happiness and Time Use (Without Covariates)

|                               | <b>Effect Size</b> | <b>95% CI</b>   | <b>Two-tailed p-value</b> |
|-------------------------------|--------------------|-----------------|---------------------------|
| <b>Necessities</b>            | 0.00               | [-0.013,0.011]  | 0.876                     |
| <b>Overall Leisure</b>        | 0.01               | [-0.041,0.066]  | 0.639                     |
| <b>Work</b>                   | 0.00               | [-0.031,0.023]  | 0.755                     |
| <i>Necessities</i>            |                    |                 |                           |
| <b>Chores</b>                 | -0.06              | [-0.098,-0.017] | 0.006                     |
| <b>Caretaking/Family Time</b> | 0.04               | [-0.036,0.111]  | 0.315                     |
| <b>Caretaking</b>             | -0.08              | [-.174, .021]   | 0.126                     |
| <i>Leisure</i>                |                    |                 |                           |
| <b>Active Leisure</b>         | 0.12               | [0.067,0.177]   | 0.000                     |
| <b>Passive Leisure</b>        | -0.11              | [-0.151,-0.079] | 0.000                     |

*Note.* CI= confidence interval. Beta estimates represent coefficients in standard deviation units. Pooled data from 9 samples were used in the analysis. Necessities, chores and caretaking were not measured in Samples 1, 2 and 8. Passive leisure was not measured in Samples 2 and 3. Overall leisure is a composite of active and passive leisure. Work is paid work except for Samples 8-9 where it is paid work and schoolwork. Caretaking/family time was measured as 'taking care of family (kids or elderly) in Samples 3 and 4, and 'taking care of others or spending time with family' in Samples 5, 6, and 7. The caretaking analysis was restricted to Sample 3 to capture the pure measure of taking care of family. Guided by ikelihood ratio tests, random slopes were used in all models and random intercept model was used when necessities was a predictor.. Covariances were unstructured (except for active leisure where an independent covariance was specified). The main effects for chores remain robust after applying Bonferroni corrections, which involve using an alpha/5 for testing 5 time use models that we preregistered (necessities, overall leisure, active leisure, passive leisure, work) in evaluating the statistical significance.

**Sample 9 (924): All Results for Longitudinal Sample****Table S12a**

Demographic characteristics of survey respondents in longitudinal student data

|                                              |              |
|----------------------------------------------|--------------|
| <i>n</i>                                     | 924          |
| Mean ( <i>SD</i> ) age, years                | 21 (1.6)     |
| % Female                                     | 73%          |
| % White                                      | 62%          |
| % Black                                      | 3%           |
| % Asian                                      | 21%          |
| % Hispanic                                   | 7%           |
| % Other Race                                 | 7%           |
| Mean ( <i>SD</i> ) parents' education, years | 5.71 (1.16)  |
| Median parents' income                       | 8.50 (3.84)  |
| Mean ( <i>SD</i> ) no. cohabitants           | 3.03 (1.72)  |
| Mean ( <i>SD</i> ) no. days in survey, years | 12.48 (8.62) |

*Note.* Age ranged from 18 to 25. Education was measured as the average of 7 educational levels (from some grade school to post-grad degree) for parents 1 and 2. The mean and median of the income was equal. Range for no of cohabitants was 0 to 10 and for no of days since survey launch was 0 to 44.

**Table S12b**

Descriptive statistics for the main study variables

|                                     | <b>Time 1</b> |           | <b>Time 2</b> |           |
|-------------------------------------|---------------|-----------|---------------|-----------|
|                                     | <b>Mean</b>   | <b>SD</b> | <b>Mean</b>   | <b>SD</b> |
| <b><i>Subjective well-being</i></b> |               |           |               |           |
| Overall Happiness                   | 5.63          | 1.92      | 6.08          | 1.87      |
| Positive Affect                     | 3.25          | 0.75      | 3.39          | 0.77      |
| Negative Affect                     | 3.08          | 0.84      | 2.88          | 0.85      |
| Meaning in Life                     | 4.13          | 1.54      | 4.16          | 1.45      |
| <b><i>Time-Use Composites</i></b>   |               |           |               |           |
| % Work                              | 0.17          | 0.12      | 0.18          | 0.13      |
| % Overall leisure                   | 0.4           | 0.14      | 0.39          | 0.15      |
| % Active leisure                    | 0.17          | 0.1       | 0.17          | 0.1       |
| % Passive leisure                   | 0.23          | 0.13      | 0.22          | 0.13      |
| % Necessities                       | 0.1           | 0.06      | 0.1           | 0.06      |

*Note.* Global happiness was measured with the question: “Taking all things together, how happy would you say you are?” rated from 0 (Not at all) to 10 (Extremely). Positive affect was measured with three positive feelings experienced last week, and negative affect with three negative feelings experienced last week (1 = Very rarely, 5 = Very often/always). Work was captured with 3-items (work, study, commuting). Overall leisure was the sum of active and passive leisure. Active leisure was the sum of time spent praying/worshipping/meditating, socializing, exercising, intimate relations, going outdoors, hobbies. Passive leisure was the sum of time spent watching tv, napping/resting, relaxing, doing nothing. Necessities was measured as the sum of time spent shopping, personal hygiene, preparing food, doing housework. For each composite, an episode weighted statistics was computed where the amount of time that respondents reported spending on each activity is weighted by the total amount of time spent in all measured activities: work, active leisure, passive leisure, necessities and other measured activities (phone/computer use, eating, waiting +other, social media use).

**Table S12c**

Regression analyses predicting time-use differences at Time 1 by socio-demographic status (Sample 9)

|                     | <b>Model 1</b> |                | <b>Model 2</b>         |                | <b>Model 3</b>        |                | <b>Model 4</b>         |                | <b>Model 5</b>     |                |
|---------------------|----------------|----------------|------------------------|----------------|-----------------------|----------------|------------------------|----------------|--------------------|----------------|
|                     | <b>Work</b>    |                | <b>Overall leisure</b> |                | <b>Active Leisure</b> |                | <b>Passive Leisure</b> |                | <b>Necessities</b> |                |
|                     | $\beta$        | <i>p-value</i> | $\beta$                | <i>p-value</i> | $\beta$               | <i>p-value</i> | $\beta$                | <i>p-value</i> | $\beta$            | <i>p-value</i> |
| Gender (1 = female) | .00            | .826           | -.01                   | .215           | -.02                  | .001           | .01                    | .257           | .14                | .002           |
| SES                 | .00            | .362           | .00                    | .578           | .01                   | .001           | -.02                   | .002           | -.04               | .114           |
| Education           | .00            | .584           | .01                    | .446           | .01                   | .116           | -.01                   | .049           | .00                | .962           |
| Income              | .00            | .656           | .00                    | .922           | .01                   | .128           | -.01                   | .218           | -.02               | .410           |

*Note.* Work was captured with 3-items (work, study, commuting). Overall leisure was the sum of active and passive leisure. Active leisure was the sum of time spent praying/worshipping/meditating, socializing, exercising, intimate relations, going outdoors, hobbies. Passive leisure was the sum of time spent watching tv, napping/resting, relaxing, doing nothing. Necessities was measured as the sum of time spent shopping, personal hygiene, preparing food, doing housework For each composite, an episode weighted statistics was computed where the amount of time that respondents reported spending on each activity is weighted by the total amount of time spent in all measured activities: work, active leisure, passive leisure, necessities and other measured activities (phone/computer use, eating, waiting +other, social media use). The weighted time-use necessities were log transformed as skewness was greater than 3. Covariates were: age (range = 18 to 25), gender (female=1, male=0), race (dummy variables for being White, Black, Asian, Hispanic and Other), SES (education and income were entered as a composite or individually depending on the model), number of days since survey launch, number of co-habitants (range = 0 to 10).

**Table S12d**

Regression analyses predicting differences in SWB at Time 1 by socio-demographic status (Sample 9)

|                     | <b>Model 1</b> |                | <b>Model 2</b>           |                | <b>Model 3</b>         |                | <b>Model 4</b>         |                | <b>Model 5</b>         |                |
|---------------------|----------------|----------------|--------------------------|----------------|------------------------|----------------|------------------------|----------------|------------------------|----------------|
|                     | <b>SWB</b>     |                | <b>Overall happiness</b> |                | <b>Positive Affect</b> |                | <b>Negative Affect</b> |                | <b>Meaning in Life</b> |                |
|                     | <i>β</i>       | <i>p-value</i> | <i>β</i>                 | <i>p-value</i> | <i>β</i>               | <i>p-value</i> | <i>β</i>               | <i>p-value</i> | <i>β</i>               | <i>p-value</i> |
| Gender (1 = female) | -.23           | 0              | -.25                     | .001           | -.15                   | .052           | .29                    | .00            | -.24                   | .001           |
| SES                 | .1             | .006           | .1                       | .017           | .15                    | 0              | -.05                   | .204           | .07                    | .081           |
| Education           | .01            | .865           | 0                        | .980           | .04                    | .409           | .02                    | .717           | 0                      | .977           |
| Income              | .07            | .052           | .06                      | .134           | .11                    | .013           | -.05                   | .269           | .06                    | .177           |

*Note.* Work was captured with 3-items (work, study, commuting). Overall leisure was the sum of active and passive leisure. Active leisure was the sum of time spent praying/worshipping/meditating, socializing, exercising, intimate relations, going outdoors, hobbies. Passive leisure was the sum of time spent watching tv, napping/resting, relaxing, doing nothing. Necessities was measured as the sum of time spent shopping, personal hygiene, preparing food, doing housework For each composite, an episode weighted statistics was computed where the amount of time that respondents reported spending on each activity is weighted by the total amount of time spent in all measured activities: work, active leisure, passive leisure, necessities and other measured activities (phone/computer use, eating, waiting +other, social media use). The weighted time-use necessities were log transformed as skewness was greater than 3. Covariates were: age (range = 18 to 25), gender (female=1, male=0), race (dummy variables for being White, Black, Asian, Hispanic and Other), SES (education and income were entered as a composite or individually depending on the model), number of days since survey launch, number of co-habitants (range = 0 to 10).

**Table S12e**

Regression analyses predicting differences in SWB at Time 2 by socio-demographic status (Sample 9)

|                     | <b>Model 1</b> |                | <b>Model 2</b>           |                | <b>Model 3</b>         |                | <b>Model 4</b>         |                | <b>Model 5</b>         |                |
|---------------------|----------------|----------------|--------------------------|----------------|------------------------|----------------|------------------------|----------------|------------------------|----------------|
|                     | <b>SWB</b>     |                | <b>Overall happiness</b> |                | <b>Positive Affect</b> |                | <b>Negative Affect</b> |                | <b>Meaning in Life</b> |                |
|                     | $\beta$        | <i>p-value</i> | $\beta$                  | <i>p-value</i> | $\beta$                | <i>p-value</i> | $\beta$                | <i>p-value</i> | $\beta$                | <i>p-value</i> |
| Gender (1 = female) | -.16           | .013           | -.17                     | .026           | -.05                   | .529           | .28                    | .00            | -.16                   | .034           |
| SES                 | .06            | .082           | .09                      | .024           | .1                     | .019           | 0                      | .986           | .10                    | .021           |
| Education           | .00            | .988           | .03                      | .517           | .01                    | .791           | .04                    | .38            | .04                    | .436           |
| Income              | .05            | .168           | .05                      | .221           | .08                    | .076           | -.03                   | .516           | .06                    | .147           |

*Note.* Work was captured with 3-items (work, study, commuting). Overall leisure was the sum of active and passive leisure. Active leisure was the sum of time spent praying/worshipping/meditating, socializing, exercising, intimate relations, going outdoors, hobbies. Passive leisure was the sum of time spent watching tv, napping/resting, relaxing, doing nothing. Necessities was measured as the sum of time spent shopping, personal hygiene, preparing food, doing housework. For each composite, an episode weighted statistics was computed where the amount of time that respondents reported spending on each activity is weighted by the total amount of time spent in all measured activities: work, active leisure, passive leisure, necessities and other measured activities (phone/computer use, eating, waiting +other, social media use). The weighted time-use necessities were log transformed as skewness was greater than 3. Covariates were: age (range = 18 to 25), gender (female=1, male=0), race (dummy variables for being White, Black, Asian, Hispanic and Other), SES (education and income were entered as a composite or individually depending on the model), number of days since survey launch, number of co-habitants (range = 0 to 10).

**Table S12f**

Regression analyses predicting differences in SWB at Time 2 by socio-demographic status - controlling for SWB at Time 1 (Sample 9)

|                     | <b>Model 1</b> |                | <b>Model 2</b>           |                | <b>Model 3</b>         |                | <b>Model 4</b>         |                | <b>Model 5</b>         |                |
|---------------------|----------------|----------------|--------------------------|----------------|------------------------|----------------|------------------------|----------------|------------------------|----------------|
|                     | <b>SWB</b>     |                | <b>Overall happiness</b> |                | <b>Positive Affect</b> |                | <b>Negative Affect</b> |                | <b>Meaning in Life</b> |                |
|                     | <i>β</i>       | <i>p-value</i> | <i>β</i>                 | <i>p-value</i> | <i>β</i>               | <i>p-value</i> | <i>β</i>               | <i>p-value</i> | <i>β</i>               | <i>p-value</i> |
| Gender (1 = female) | -.01           | .832           | -.01                     | .827           | .04                    | .524           | .12                    | .053           | -.01                   | .915           |
| SES                 | .00            | .924           | .03                      | .303           | .01                    | .740           | .03                    | .415           | .05                    | .126           |

*Note.* Work was captured with 3-items (work, study, commuting). Overall leisure was the sum of active and passive leisure. Active leisure was the sum of time spent praying/worshipping/meditating, socializing, exercising, intimate relations, going outdoors, hobbies. Passive leisure was the sum of time spent watching tv, napping/resting, relaxing, doing nothing. Necessities was measured as the sum of time spent shopping, personal hygiene, preparing food, doing housework. For each composite, an episode weighted statistics was computed where the amount of time that respondents reported spending on each activity is weighted by the total amount of time spent in all measured activities: work, active leisure, passive leisure, necessities and other measured activities (phone/computer use, eating, waiting +other, social media use). The weighted time-use necessities were log transformed as skewness was greater than 3. Covariates were: age (range = 18 to 25), gender (female=1, male=0), race (dummy variables for being White, Black, Asian, Hispanic and Other), SES (education and income were entered as a composite or individually depending on the model), number of days since survey launch, number of co-habitants (range = 0 to 10).

**Table S12g**

Regression analyses predicting SWB at Time 2 by time-use composites at Time 1 (Sample 9)

|                   | <b>Model 1</b> |                | <b>Model 2</b>           |                | <b>Model 3</b>         |                | <b>Model 4</b>         |                | <b>Model 5</b>         |                |
|-------------------|----------------|----------------|--------------------------|----------------|------------------------|----------------|------------------------|----------------|------------------------|----------------|
|                   | <b>SWB</b>     |                | <b>Overall happiness</b> |                | <b>Positive Affect</b> |                | <b>Negative Affect</b> |                | <b>Meaning in Life</b> |                |
|                   | $\beta$        | <i>p-value</i> | $\beta$                  | <i>p-value</i> | $\beta$                | <i>p-value</i> | $\beta$                | <i>p-value</i> | $\beta$                | <i>p-value</i> |
| % Work            | .33            | .171           | .43                      | .113           | .08                    | .764           | -.47                   | .08            | .19                    | .499           |
| % Overall leisure | .34            | .098           | .18                      | .446           | .39                    | .09            | -.45                   | .052           | .38                    | .104           |
| % Active leisure  | 1.81           | .000           | 2.05                     | .000           | 1.83                   | .000           | -1.56                  | .000           | 1.74                   | .000           |
| % Passive leisure | -.67           | .002           | -1.00                    | .000           | -.63                   | .011           | .40                    | .106           | -.58                   | .021           |
| % Necessities     | .08            | .121           | .13                      | .016           | .08                    | .154           | -.01                   | .795           | .04                    | .501           |

*Note.* Work was captured with 3-items (work, study, commuting). Overall leisure was the sum of active and passive leisure. Active leisure was the sum of time spent praying/worshipping/meditating, socializing, exercising, intimate relations, going outdoors, hobbies. Passive leisure was the sum of time spent watching tv, napping/resting, relaxing, doing nothing. Necessities was measured as the sum of time spent shopping, personal hygiene, preparing food, doing housework. For each composite, an episode weighted statistics was computed where the amount of time that respondents reported spending on each activity is weighted by the total amount of time spent in all measured activities: work, active leisure, passive leisure, necessities and other measured activities (phone/computer use, eating, waiting +other, social media use). The weighted time-use necessities were log transformed as skewness was greater than 3. Covariates were: age (range = 18 to 25), gender (female=1, male=0), race (dummy variables for being White, Black, Asian, Hispanic and Other), SES (education and income were entered as a composite or individually depending on the model), number of days since survey launch, number of co-habitants (range = 0 to 10).



**Table S12h**

Regression analyses predicting SWB at Time 2 by time-use composites at Time 1 - controlling for SWB at Time 1 (Sample 9)

|                   | <b>Model 1</b> |                | <b>Model 2</b>           |                | <b>Model 3</b>         |                | <b>Model 4</b>         |                | <b>Model 5</b>         |                |
|-------------------|----------------|----------------|--------------------------|----------------|------------------------|----------------|------------------------|----------------|------------------------|----------------|
|                   | <b>SWB</b>     |                | <b>Overall happiness</b> |                | <b>Positive Affect</b> |                | <b>Negative Affect</b> |                | <b>Meaning in Life</b> |                |
|                   | $\beta$        | <i>p-value</i> | $\beta$                  | <i>p-value</i> | $\beta$                | <i>p-value</i> | $\beta$                | <i>p-value</i> | $\beta$                | <i>p-value</i> |
| % Work            | .19            | .296           | .37                      | .092           | -.04                   | .855           | -.3                    | .191           | -.14                   | .529           |
| % Overall leisure | .05            | .733           | -.1                      | .593           | .17                    | .374           | -.21                   | .283           | .25                    | .172           |
| % Active leisure  | .41            | .062           | .79                      | .003           | .59                    | .029           | -.47                   | .094           | .76                    | .003           |
| % Passive leisure | -.17           | .307           | -.56                     | .006           | -.14                   | .494           | .02                    | .916           | -.15                   | .456           |
| % Necessities     | .01            | .843           | .10                      | .023           | -.01                   | .749           | .04                    | .427           | -.01                   | .813           |

*Note.* Work was captured with 3-items (work, study, commuting). Overall leisure was the sum of active and passive leisure. Active leisure was the sum of time spent praying/worshipping/meditating, socializing, exercising, intimate relations, going outdoors, hobbies. Passive leisure was the sum of time spent watching tv, napping/resting, relaxing, doing nothing. Necessities was measured as the sum of time spent shopping, personal hygiene, preparing food, doing housework. For each composite, an episode weighted statistics was computed where the amount of time that respondents reported spending on each activity is weighted by the total amount of time spent in all measured activities: work, active leisure, passive leisure, necessities and other measured activities (phone/computer use, eating, waiting +other, social media use). The weighted time-use necessities were log transformed as skewness was greater than 3. Covariates were: age (range = 18 to 25), gender (female=1, male=0), race (dummy variables for being White, Black, Asian, Hispanic and Other), SES (education and income were entered as a composite or individually depending on the model), number of days since survey launch, number of co-habitants (range = 0 to 10).

**Table S12i**

Regression analyses predicting individual time-use differences at Time 1 by socio-demographic status (Sample 9)

|                       | <b>Gender (1 = female)</b> | <b>SES</b>               |
|-----------------------|----------------------------|--------------------------|
| <b>Commuting</b>      | $\beta = -.13, p = .324$   | $\beta = -.07, p = .324$ |
| <b>Working</b>        | $\beta = .00, p = .393$    | $\beta = .00, p = .122$  |
| <b>Learning</b>       | $\beta = .00, p = .723$    | $\beta = .01, p = .002$  |
| <b>Praying</b>        | $\beta = -.10, p = .412$   | $\beta = -.07, p = .289$ |
| <b>Socializing</b>    | $\beta = -.01, p = .929$   | $\beta = .05, p = .277$  |
| <b>Exercising</b>     | $\beta = .000, p = .774$   | $\beta = .00, p < .001$  |
| <b>Intimate</b>       | $\beta = -.14, p = .234$   | $\beta = .01, p = .848$  |
| <b>Outdoor</b>        | $\beta = .00, p = .829$    | $\beta = .00, p = .001$  |
| <b>Hobbies</b>        | $\beta = -.32, p < .001$   | $\beta = -.03, p = .502$ |
| <b>Watching TV</b>    | $\beta = .02, p < .001$    | $\beta = .01, p = .048$  |
| <b>Napping</b>        | $\beta = .01, p = .205$    | $\beta = -.01, p < .001$ |
| <b>Relaxing</b>       | $\beta = .00, p = .468$    | $\beta = .00, p = .975$  |
| <b>Doing nothing</b>  | $\beta = .00, p = .868$    | $\beta = -.01, p = .002$ |
| <b>Shopping</b>       | $\beta = .00, p = .977$    | $\beta = .01, p = .846$  |
| <b>Hygiene</b>        | $\beta = .09, p = .203$    | $\beta = -.05, p = .246$ |
| <b>Preparing food</b> | $\beta = .04, p = .537$    | $\beta = -.02, p = .649$ |
| <b>Housework</b>      | $\beta = .00, p = .048$    | $\beta = .00, p = .229$  |
| <b>Phone/Computer</b> | $\beta = -.03, p = .001$   | $\beta = .00, p = .492$  |
| <b>Eating</b>         | $\beta = .11, p = .036$    | $\beta = .09, p = .001$  |
| <b>Waiting/Other</b>  | $\beta = .11, p = .303$    | $\beta = .04, p = .445$  |
| <b>Social Media</b>   | $\beta = .02, p < .001$    | $\beta = .00, p = .620$  |

*Note.* Covariates were: age (range = 18 to 25), gender (female=1, male=0), race (dummy variables for being White, Black, Asian, Hispanic and Other), SES (education and income were entered as a composite or individually depending on the model), number of days since survey launch, number of co-habitants (range = 0 to 10).

### Exploratory analyses with recalled pre-COVID-19 time-use

In the surveys of remote workers who were recruited primarily from the US and Brazil ( $n = 24,327$ ), respondents also indicated what their time allocation looked like in a typical day prior to the pandemic. Below, we report results when controlling for these recalled pre-COVID-19 time-use measures. Additional results are present in Tables S13a-4c.

#### Sample 5

In models without covariates, gender differences in time-use did not hold when controlling for recalled pre-COVID-19 time-use. However, in models with our preregistered covariates, gender differences in time spent on necessities remained significant when controlling for these measures ( $M_{\text{women}} = 16.81$ ,  $SD = 10.08$  vs.  $M_{\text{men}} = 15.66$ ,  $SD = 7.83$ ,  $d = .12$ ,  $p = .004$ ; see Table S14a).

Exploratory analyses controlling for recalled pre-COVID-19 time-use showed a significant interaction between gender and parental status on overall leisure ( $F[1, 1,255] = 4.70$ ,  $p = .030$ ) and on necessities ( $F[1, 1,255] = 15.17$ ,  $p < .001$ ). Time spent on necessities increased for both mothers and fathers compared to non-mothers and non-fathers ( $M_{\text{mothers}} = 23.84$ ,  $SD = 10.93$ , vs.  $M_{\text{non-mothers}} = 13.56$ ,  $SD = 7.75$ ,  $d = 1.16$ ,  $p < .001$ ;  $M_{\text{fathers}} = 18.98$ ,  $SD = 7.51$  vs.  $M_{\text{non-fathers}} = 13.64$ ,  $SD = 7.33$ ,  $d = .72$ ,  $p = .048$ ). Simple slopes analyses showed that the differences in time spent on necessities *were* significant among parents ( $d = .53$ ,  $p < .001$ ) but not among non-parents ( $d = .01$ ,  $p = .934$ ), suggesting that mothers (vs. fathers) experienced an increase in time spent on necessities during COVID-19 (see Fig. S6, Panel A). See Table S14a for these exploratory analyses.

#### Sample 6

Unlike Sample 5 where gender differences in time-use during COVID-19 were no longer significant when controlling for recalled pre-COVID-19 time-use, in this study these exploratory analyses revealed that the following gender differences *were* significant: overall

leisure ( $M_{\text{women}} = 13.76$ ,  $SD = 6.51$  vs.  $M_{\text{men}} = 15.79$ ,  $SD = 6.81$ ;  $d = -.30$ ,  $p < .001$ ), active leisure ( $M_{\text{women}} = 4.40$ ,  $SD = 3.79$  vs.  $M_{\text{men}} = 5.62$ ,  $SD = 4.40$ ;  $d = -.30$ ,  $p < .001$ ), and necessities ( $M_{\text{women}} = 22.14$ ,  $SD = 10.54$  vs.  $M_{\text{men}} = 19.32$ ,  $SD = 9.60$ ;  $d = .28$ ,  $p < .001$ ), possibly due to having a larger sample size to detect such differences (see Table S14b).

Next, we ran exploratory analyses controlling for recalled pre-COVID-19 time-use and found a significant interaction between gender and parental status on overall leisure ( $F[1, 19,116] = 15.96$ ,  $p < .001$ ), passive leisure ( $F[1, 19,116] = 17.74$ ,  $p < .001$ ), and necessities ( $F[1, 19,116] = 39.80$ ,  $p < .001$ ). Time spent on overall leisure decreased for both mothers and fathers compared to non-mothers and non-fathers ( $M_{\text{mothers}} = 11.63$ ,  $SD = 6.03$  vs.  $M_{\text{non-mothers}} = 15.15$ ,  $SD = 15.15$ ,  $d = -.56$ ,  $p < .001$ ;  $M_{\text{fathers}} = 14.25$ ,  $SD = 6.25$  vs.  $M_{\text{non-fathers}} = 16.95$ ,  $SD = 6.99$ ,  $d = -.40$ ,  $p = .048$ ). The differences in time-use were significant among non-parents ( $d = -.15$ ,  $p < .001$ ) and parents ( $d = -.43$ ,  $p = .934$ ), suggesting that women, and especially mothers, experienced a decrease in time spent on overall leisure during COVID-19. These differences hold for our preregistered covariates.

Regarding passive leisure differences, both mothers and fathers spent less time pursuing passive leisure activities ( $M_{\text{mothers}} = 7.74$ ,  $SD = 4.62$  vs.  $M_{\text{non-mothers}} = 10.42$ ,  $SD = 5.30$ ,  $d = -.53$ ,  $p < .001$ ;  $M_{\text{fathers}} = 9.07$ ,  $SD = 4.80$  vs.  $M_{\text{non-fathers}} = 11.01$ ,  $SD = 5.80$ ,  $d = -.36$ ,  $p = .004$ ). While these differences in time-use were not significant among non-parents ( $d = -.11$ ,  $p = .915$ ), they *were* among parents ( $d = -.28$ ,  $p < .001$ ).

In terms of necessities and similar to Sample 5 results, both mothers and fathers spent more time on necessities ( $M_{\text{mothers}} = 26.52$ ,  $SD = 11.05$  vs.  $M_{\text{non-mothers}} = 19.28$ ,  $SD = 9.13$ ,  $d = .73$ ,  $p < .001$ ;  $M_{\text{fathers}} = 22.13$ ,  $SD = 9.67$  vs.  $M_{\text{non-fathers}} = 17.21$ ,  $SD = 8.99$ ,  $d = .53$ ,  $p < .001$ ). The differences in time-use were significant among non-parents ( $d = .23$ ,  $p < .001$ ) and among parents ( $d = .42$ ,  $p < .001$ ), suggesting that while both parents spent more time on

necessities during the pandemic than before, mothers might have experienced a greater increase in time spent on necessities (see Fig. S6, Panel B).

### **Sample 7**

In this study, gender differences in time-use were not significant when running exploratory analyses controlling for the recalled pre-COVID-19 time-use (see Table S11h). Next, we ran exploratory analyses controlling for these recalled time-use measures. Unlike Studies 5-6 results, the interaction between gender and parental status on necessities was not significant even in models with covariates ( $F[1, 729] = .114, p = .735$ ), suggesting that in this sample the potential increase in time spent on necessities did not differ by gender among parents, possibly due to the diversity of countries included in this sample. See Table S14c for detailed results.

**Table S13a**

Descriptive statistics for recalled pre-COVID time-use and mean differences with during COVID time-use (Sample 5)

|                               | During-COVID<br>Time-use |      | Recalled Pre-COVID<br>Time-Use |      | $\Delta$ between pre and<br>during COVID | Two-tailed<br>t-value | p-value |
|-------------------------------|--------------------------|------|--------------------------------|------|------------------------------------------|-----------------------|---------|
|                               | Mean                     | SD   | Mean                           | SD   |                                          |                       |         |
| Work <sup>a</sup>             | 1.57%                    | .12  | 1.60%                          | .12  | -.03                                     | -14.76                | < .001  |
| <i>Model with covariates:</i> | 1.56%                    | .12  | 1.59%                          | .12  | -.03                                     | -                     | < .001  |
| Overall leisure               | 15.99%                   | 6.99 | 15.29%                         | 7.12 | .70                                      | 4.75                  | < .001  |
| <i>Model with covariates:</i> | 16.52%                   | 6.95 | 15.52%                         | 6.98 | -.66                                     | -                     | < .001  |
| Active leisure                | 6.75%                    | 4.22 | 6.95%                          | 4.66 | -.20                                     | -1.67                 | .095    |
| <i>Model with covariates:</i> | 6.72%                    | 4.09 | 6.98%                          | 4.52 | -.26                                     | -                     | .046    |
| Passive leisure               | 9.38%                    | 5.68 | 8.44%                          | 5.31 | .93                                      | 8.01                  | < .001  |
| <i>Model with covariates:</i> | 9.57%                    | 5.75 | 8.62%                          | 5.32 | .94                                      | -                     | < .001  |
| Necessities                   | 16.47%                   | 9.34 | 14.40%                         | 8.05 | 2.07                                     | 12.34                 | < .001  |
| <i>Model with covariates:</i> | 16.39%                   | 9.28 | 14.28%                         | 7.89 | 2.10                                     | -                     | < .001  |

*Note.* For models without covariates we ran paired t-tests. For models with covariates we ran repeated measures models with time as a within-subjects factor.

Descriptive statistics for the time-use measures are reported as episode-weighted statistics (i.e. the percentage of time that respondents reported spending on each activity is weighted by the total amount of time they spent in all other activities measured within that sample). Work is a composite of 2 items (i.e. working productively, working unproductively); overall leisure is a composite of 1 item capturing active leisure like going outdoors, and 1 item capturing passive leisure like watching TV. Necessities is a composite of 2 items (i.e. doing errands/household chores and taking care of/spending time with family). Overall leisure is a composite of active and passive leisure. <sup>a</sup> Given that the skewness value of the time-use work composite was above 8.32 (thus above the pre-registered cutoff point of 2), we log transformed this variable.

**Table S13b**

Descriptive statistics for recalled pre-COVID time-use and mean differences with during COVID time-use (Sample 6)

|                               | During-COVID<br>Time-use |       | Recalled Pre-COVID<br>Time-use |      | $\Delta$ between pre and<br>during COVID | Two-tailed<br>t-value | p-value |
|-------------------------------|--------------------------|-------|--------------------------------|------|------------------------------------------|-----------------------|---------|
|                               | Mean                     | SD    | Mean                           | SD   |                                          |                       |         |
| Work                          | 34.94%                   | 9.42  | 36.70%                         | 8.98 | -1.76                                    | -34.72                | < .001  |
| <i>Model with covariates:</i> | 34.85%                   | 9.34  | 36.67%                         | 8.88 | -1.83                                    |                       | < .001  |
| Overall leisure               | 14.62%                   | 6.81  | 16.05%                         | 7.02 | -1.43                                    | -35.94                | < .001  |
| <i>Model with covariates:</i> | 14.65%                   | 6.77  | 16.04%                         | 6.96 | -1.40                                    |                       | < .001  |
| Active leisure                | 5.00%                    | 4.21  | 7.14%                          | 8.84 | -2.14                                    | -63.85                | < .001  |
| <i>Model with covariates:</i> | 5.00%                    | 4.16  | 7.13%                          | 4.80 | -2.13                                    |                       | < .001  |
| Passive leisure               | 9.78%                    | 5.39  | 9.01%                          | 5.05 | .77                                      | 27.43                 | < .001  |
| <i>Model with covariates:</i> | 9.80%                    | 5.39  | 9.02%                          | 5.05 | .79                                      |                       | < .001  |
| Necessities                   | 20.87%                   | 10.27 | 17.62%                         | 9.13 | 3.25                                     | 66.06                 | < .001  |
| <i>Model with covariates:</i> | 20.82%                   | 10.26 | 17.54%                         | 9.07 | 3.29                                     |                       | < .001  |

*Note.* For models without covariates we ran paired t-tests. For models with covariates we ran repeated measures models with time as a within-subjects factor.

Descriptive statistics for the time-use measures are reported as episode-weighted statistics (i.e. the percentage of time that respondents reported spending on each activity is weighted by the total amount of time they spent in all other activities measured within that sample). Work is a composite of 2 items (i.e. working productively, working unproductively); overall leisure is a composite of 1 item capturing active leisure like going outdoors, and 1 item capturing passive leisure like watching TV. Necessities is a composite of 2 items (i.e. doing errands/household chores and taking care of/spending time with family). Overall leisure is a composite of active and passive leisure.

**Table S13c**

Descriptive statistics for recalled pre-COVID time-use and mean differences with during COVID time-use (Sample 7)

|                               | During-COVID<br>Time-use |       | Recalled Pre-COVID<br>Time-use |      | $\Delta$ between pre and during<br>COVID | Two-tailed<br>t-value | p-value |
|-------------------------------|--------------------------|-------|--------------------------------|------|------------------------------------------|-----------------------|---------|
|                               | Mean                     | SD    | Mean                           | SD   |                                          |                       |         |
| Work                          | 35.95%                   | 9.73  | 37.43%                         | 8.85 | -1.48                                    | -6.12                 | < .001  |
| <i>Model with covariates:</i> | 36.06%                   | 9.70  | 37.65%                         | 8.60 | -1.59                                    |                       | < .001  |
| Overall leisure               | 15.80%                   | 7.43  | 16.40%                         | 7.10 | -.60                                     | -3.22                 | .001    |
| <i>Model with covariates:</i> | 15.63%                   | 7.22  | 16.17%                         | 6.76 | -.54                                     |                       | .009    |
| Active leisure                | 5.86%                    | 4.54  | 7.47%                          | 5.11 | -1.61                                    | -9.89                 | < .001  |
| <i>Model with covariates:</i> | 5.71%                    | 4.39  | 7.28%                          | 4.87 | -1.58                                    |                       | < .001  |
| Passive leisure               | 10.06%                   | 5.87  | 9.00%                          | 5.19 | 1.07                                     | 7.10                  | < .001  |
| <i>Model with covariates:</i> | 10.04%                   | 5.75  | 8.96%                          | 5.08 | 1.08                                     |                       | < .001  |
| Necessities                   | 18.32%                   | 10.14 | 15.89%                         | 9.06 | 2.43                                     | 11.07                 | < .001  |
| <i>Model with covariates:</i> | 18.29%                   | 10.14 | 15.84%                         | 9.15 | 2.45                                     |                       | < .001  |

*Note.* For models without covariates we ran paired t-tests. For models with covariates we ran repeated measures models with time as a within-subjects factor. Descriptive statistics for the time-use measures are reported as episode-weighted statistics (i.e. the percentage of time that respondents reported spending on each activity is weighted by the total amount of time they spent in all other activities measured within that sample). Work is a composite of 2 items (i.e. working productively, working unproductively); overall leisure is a composite of 1 item capturing active leisure like going outdoors, and 1 item capturing passive leisure like watching TV. Necessities is a composite of 2 items (i.e. doing errands/household chores and taking care of/spending time with family). Overall leisure is a composite of active and passive leisure.



**Table S14a**

Regression analyses predicting time-use differences in necessities by gender and parental status controlling for recalled pre-COVID-19 time-use (Sample 5)

|                                                                    |                           |
|--------------------------------------------------------------------|---------------------------|
| Gender (1 = female)                                                | $\Delta = 1.01, p = .046$ |
| <i>Model with covariates:</i>                                      | $\Delta = 1.96, p < .001$ |
| <i>Models with recalled pre-covid-19 time-use</i>                  | $\Delta = .56, p = .108$  |
| <i>Models with recalled pre-covid-19 time-use &amp; covariates</i> | $\Delta = 1.04, p = .004$ |
| Parental status (1 = yes)                                          | $\Delta = 7.80, p < .001$ |
| <i>Model with covariates:</i>                                      | $\Delta = 7.77, p < .001$ |
| <i>Models with recalled pre-covid-19 time-use</i>                  | $\Delta = 3.53, p < .001$ |
| <i>Models with recalled pre-covid-19 time-use &amp; covariates</i> | $\Delta = 2.60, p < .001$ |
| <b>Gender (1=female) X Parental status (1=yes)</b>                 | $b = 4.96; p < .001$      |
| <i>Model with covariates:</i>                                      | $b = 5.14; p < .001$      |
| <i>Models with recalled pre-covid-19 time-use</i>                  | $b = 2.58; p < .001$      |
| <i>Models with recalled pre-covid-19 time-use &amp; covariates</i> | $b = 2.96; p < .001$      |

*Note.* Covariates vary by model depending on predictors entered in each model: age, gender, education, monthly household income, household size, number of children (under 18), and number of days since survey launch. Age, monthly household income, education, number of children (under 18), and number of days since survey launch were entered as continuous variables. Gender (1=female) was dummy coded. In this study, household size was measured as a binary variable (1=living with others; 0=living alone). All respondents in this dataset were employed adults. We did not capture weekly work hours in this dataset.

**Table S14b**

Regression analyses predicting time-use differences in necessities by gender and parental status controlling for recalled pre-COVID-19 time-use (Sample 6)

|                                                                    |                           |
|--------------------------------------------------------------------|---------------------------|
| Gender (1 = female)                                                | $\Delta = 2.81, p < .001$ |
| <i>Model with covariates:</i>                                      | $\Delta = 3.35, p < .001$ |
| <i>Models with recalled pre-covid-19 time-use</i>                  | $\Delta = 1.54, p < .001$ |
| <i>Models with recalled pre-covid-19 time-use &amp; covariates</i> | $\Delta = 1.85, p < .001$ |
| Parental status (1 = yes)                                          | $\Delta = 5.84, p < .001$ |
| <i>Model with covariates:</i>                                      | $\Delta = 7.73, p < .001$ |
| <i>Models with recalled pre-covid-19 time-use</i>                  | $\Delta = 2.64, p < .001$ |
| <i>Models with recalled pre-covid-19 time-use &amp; covariates</i> | $\Delta = 1.69, p < .001$ |
| <b>Gender (1=female) X Parental status (1=yes)</b>                 | $b = 2.24; p < .001$      |
| <i>Model with covariates:</i>                                      | $b = 2.55; p < .001$      |
| <i>Models with recalled pre-covid-19 time-use</i>                  | $b = 1.15; p < .001$      |
| <i>Models with recalled pre-covid-19 time-use &amp; covariates</i> | $b = 1.35; p < .001$      |

*Note.* Covariates vary by model depending on predictors entered in each model: age, gender, education, monthly household income, household size, number of children (under 18), and number of days since survey launch. Age, monthly household income, education, number of children (under 18), and number of days since survey launch were entered as continuous variables. Gender (1=female) was dummy coded. In this study, household size was measured as a binary variable (1=living with others; 0=living alone). All respondents in this dataset were employed adults. We did not capture weekly work hours in this dataset.

**Table S14c**

Regression analyses predicting time-use differences in necessities by gender and parental status controlling for recalled pre-COVID-19 time-use (Sample 7)

|                                                                    |                           |
|--------------------------------------------------------------------|---------------------------|
| Gender (1 = female)                                                | $\Delta = 2.45, p < .001$ |
| <i>Model with covariates:</i>                                      | $\Delta = 2.48, p < .001$ |
| <i>Models with recalled pre-covid-19 time-use</i>                  | $\Delta = .65, p = .140$  |
| <i>Models with recalled pre-covid-19 time-use &amp; covariates</i> | $\Delta = .88, p = .067$  |
| Parental status (1 = yes)                                          | $\Delta = 8.14, p < .001$ |
| <i>Model with covariates:</i>                                      | $\Delta = 6.51, p < .001$ |
| <i>Models with recalled pre-covid-19 time-use</i>                  | $\Delta = 3.95, p < .001$ |
| <i>Models with recalled pre-covid-19 time-use &amp; covariates</i> | $\Delta = 2.25, p = .014$ |
| <b>Gender (1=female) X Parental status (1=yes)</b>                 | $b = 3.31; p = .007$      |
| <i>Model with covariates:</i>                                      | $b = 2.83; p = .031$      |
| <i>Models with recalled pre-covid-19 time-use</i>                  | $b = .20; p = .919$       |
| <i>Models with recalled pre-covid-19 time-use &amp; covariates</i> | $b = .15; p = .868$       |

*Note.*  $N = 933$ . Covariates vary by model depending on predictors entered in each model: age, gender, education, monthly household income, household size, number of children (under 18), and number of days since survey launch. Age, monthly household income, education, number of children (under 18), and number of days since survey launch were entered as continuous variables. Gender (1=female) was dummy coded. In this study, household size was measured as a binary variable (1=living with others; 0=living alone). All respondents in this dataset were employed adults. We did not capture weekly work hours in this dataset.

**Fig. S6 | Interaction between gender and parental status on time spent on necessities during COVID-19**

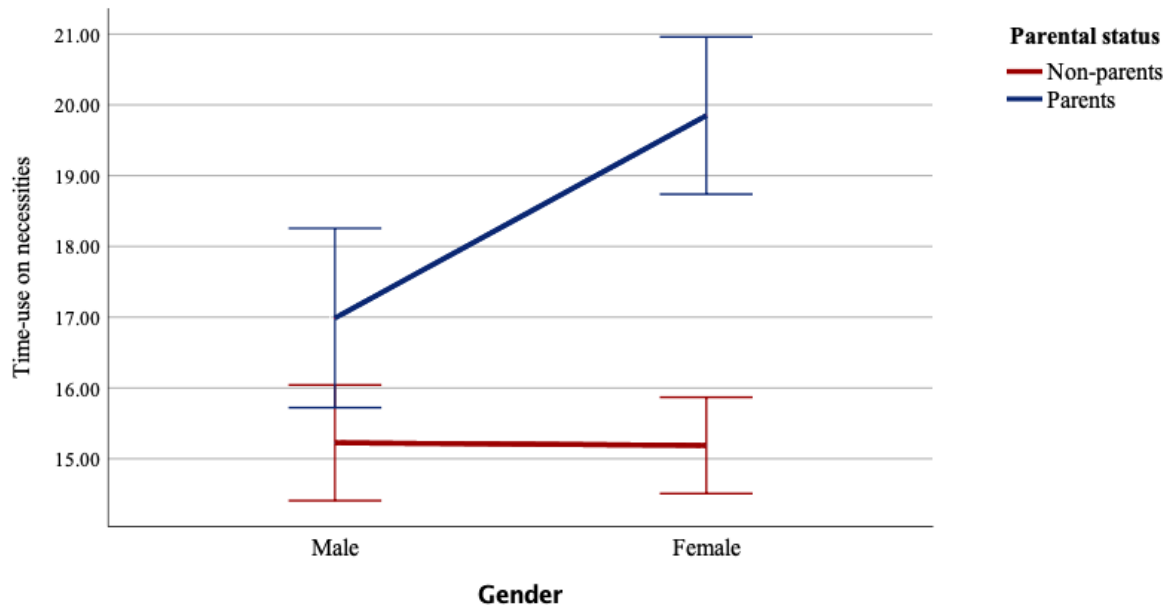

**Panel A**

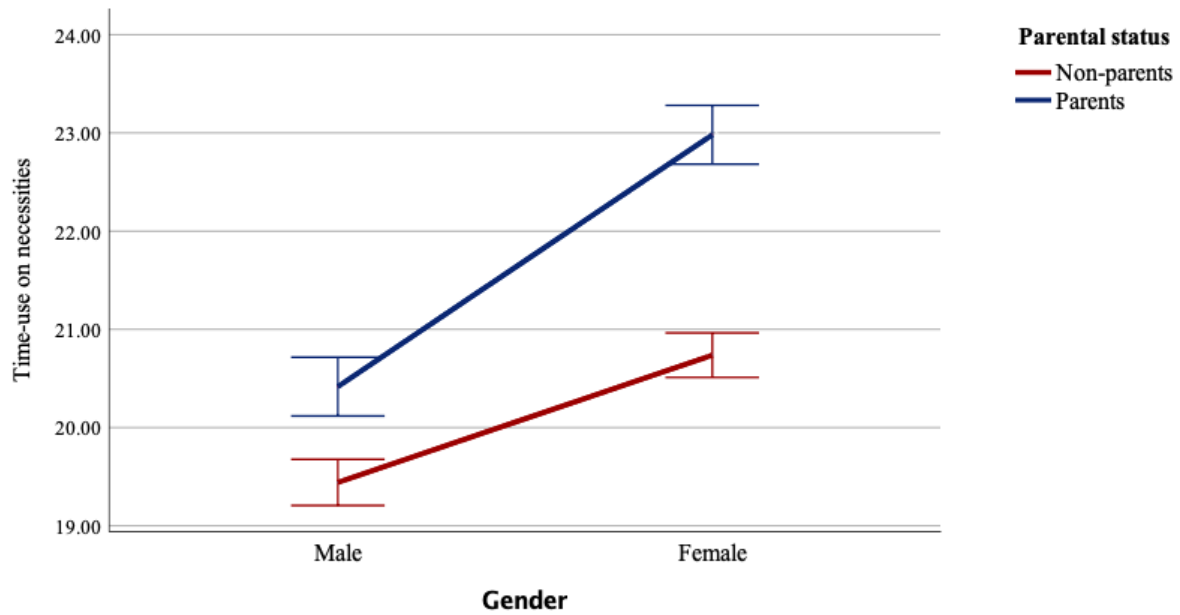

**Panel B**

*Note.* In these analyses we control for recalled time spent on necessities pre-COVID-19 as well as for our preregistered covariates: age, income, number of children, education, number of people in the household, and days since survey launch. Necessities is a composite of household chores and taking care of others. Error bars are CI<sub>95%</sub>. Panel A is the pattern observed in Sample 5 and Panel B is the pattern observed in Sample 6.

#### **Additional Analyses Sample 4: Shared Time on Chores and Caretaking Responsibilities**

**Additional measures.** As part of a different project, in Sample 4 respondents who indicated living with someone else as a couple were also asked to report: 1. How many hours did they and their partner spend together on household tasks, 2. How many hours did they spend on household chores alone without their partner, and 3. How many hours did their partner spend on household chores alone without them (slide scale from 0 to 100, with max 100 across all three questions).

In addition, among these respondents those who further indicated having children were asked to report: 1. How many hours did they and their partner spend together on caretaking tasks, 2. How many hours did they spend on caretaking tasks alone without their partner, and 3. How many hours did their partner spend on caretaking tasks alone without them (slide scale from 0 to 100, with max 100 across all three questions).

**Additional results.** We followed the same procedures as for these additional time-use measures. In line with our pre-registered steps for our main analyses, we regressed gender on these time-use outcomes. These exploratory analyses revealed no gender differences in amount of time spent together on household tasks or caretaking tasks. However, these analyses showed a consistent pattern whereby women (vs. men) reported spending more time alone than their partner on both household and caretaking (see Figure S below). Similarly, men (vs. women) reported that their partner spent more hours alone completing both household and caretaking tasks (see Figures S ).

Next, we regressed happiness on the household time-use measures and on the caretaking time-use measures respectively and found that spending time together on both types of necessities was positively associated with happiness. By contrast, completing either of these necessities alone was negatively associated with happiness. Notably, there was no association between how many hours one's partner spends on caretaking responsibilities and happiness (see Table S15 below).

**Fig. S7a | Gender differences in time spent alone or with partner on household tasks (Sample 4).**

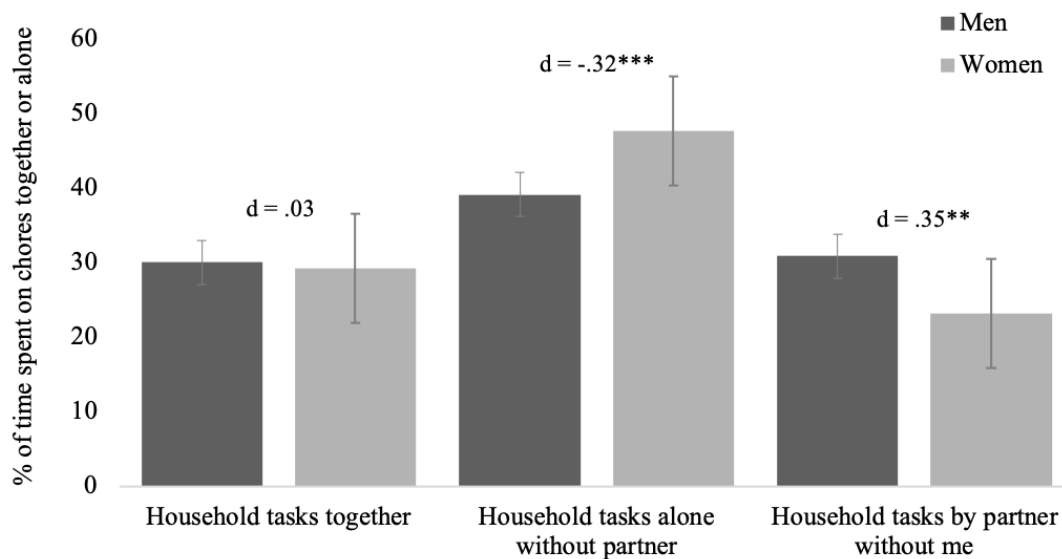

*Note.*  $N = 520$  for items capturing time spent on household tasks.  $N = 340$  for items capturing time spent on caretaking. Covariates: age, gender, employment status, education, monthly household income, household size, number of children, and number of days since survey launch. Age, monthly household income, education, household size, number of children, weekly work hours, and number of days since survey launch were entered as continuous variables. Gender (1=female) and employment status (1 = employed) were dummy coded.

**Fig. S7b | Gender differences in time spent alone or with partner on caretaking tasks (Sample 4).**

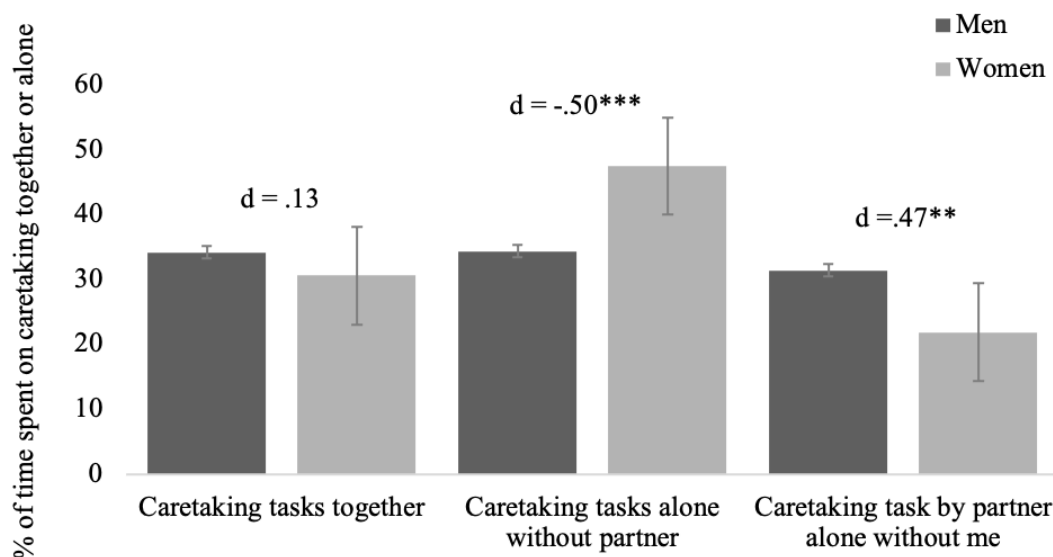

*Note.*  $N = 520$  for items capturing time spent on household tasks.  $N = 340$  for items capturing time spent on caretaking. Covariates: age, gender, employment status, education, monthly household income, household size, number of children, and number of days since survey launch. Age, monthly household income, education, household size, number of children, weekly work hours, and number of days since survey launch were entered as continuous variables. Gender (1=female) and employment status (1 = employed) were dummy coded.

**Table S15**

Additional analyses of time-use predicting happiness (Sample 4)

|                                           | Models without covariates |      |       |       |           | Models with covariates |      |       |       |           |
|-------------------------------------------|---------------------------|------|-------|-------|-----------|------------------------|------|-------|-------|-----------|
|                                           | $\beta$                   | SE   | t     | p     | r-partial | $\beta$                | SE   | t     | p     | r-partial |
| Household tasks together                  | .23                       | .043 | 5.50  | <.001 | .24       | .22                    | .055 | 3.97  | <.001 | .21       |
| Household tasks alone without partner     | -.13                      | .044 | -2.85 | .005  | -.13      | -.11                   | .055 | -1.89 | .059  | -.01      |
| Household tasks partner without me        | -.14                      | .044 | -3.18 | .002  | -.14      | -.13                   | .055 | -2.45 | .015  | -.13      |
| Caretaking tasks together                 | .18                       | .054 | 3.28  | .001  | .18       | .17                    | .055 | 3.06  | .002  | .17       |
| Caretaking tasks alone without partner    | -.15                      | .054 | -2.76 | .006  | -.15      | -.14                   | .055 | -2.53 | .012  | -.14      |
| Caretaking tasks partner alone without me | -.05                      | .054 | -.90  | .370  | -.05      | -.06                   | .056 | .99   | .320  | -.05      |

*Notes.*  $N = 520$  for items capturing time spent on household tasks.  $N = 340$  for items capturing time spent on caretaking. Covariates: age, gender, employment status, education, monthly household income, household size, number of children, and number of days since survey launch. Age, monthly household income, education, household size, number of children, weekly work hours, and number of days since survey launch were entered as continuous variables. Gender (1=female) and employment status (1 = employed) were dummy coded.
